# Supplementary material for: Freshness monitoring of raw fish by detecting biogenic amines using a gold nanoparticle-based colorimetric sensor array
Source: Royal Society of Chemistry journal article supplement (doi:10.1039/d2ra00160h), 2022-01-01
Supplement: d2ra00160h1.pdf [file d2ra00160h1.pdf]

## Electronic Supplementary Information

# Freshness monitoring of raw fish by detecting biogenic amines using a gold nanoparticle-based colorimetric sensor array

Linlin Du <sup>a, ‡</sup>, Yijia Lao <sup>a, ‡</sup>, Yui Sasaki <sup>b</sup>, Xiaojun Lyu <sup>b</sup>, Peng Gao <sup>a</sup>, Si Wu <sup>a</sup>, Tsuyoshi Minami <sup>b,\*</sup> and Yuanli Liu <sup>a,\*</sup>

<sup>a</sup> Guangxi Key Laboratory of Optical and Electronic Materials and Devices, College of Materials Science and Engineering, Guilin University of Technology, Guilin, 541004, China

Corresponding author: [lyuanli@glut.edu.cn](mailto:lyuanli@glut.edu.cn)

<sup>b</sup> Institute of Industrial Science, The University of Tokyo, Tokyo, 153-8505, Japan

Corresponding author: [tminami@iis.u-tokyo.ac.jp](mailto:tminami@iis.u-tokyo.ac.jp)

<sup>‡</sup>These authors contributed equally to this work.

## Contents

|                                                                                           |     |
|-------------------------------------------------------------------------------------------|-----|
| <b>1. Characterization of AuNPs obtained by DS or IS</b>                                  |     |
| 1-1. Extinction measurements                                                              | S3  |
| 1-2. Transmission electron microscope (TEM)                                               | S3  |
| <b>2. Characterization of AuNP-based chemosensors</b>                                     |     |
| 2-1. Extinction measurements                                                              | S4  |
| 2-2. FT-IR measurements                                                                   | S4  |
| 2-3. Thermal gravimetric analysis (TGA)                                                   | S4  |
| 2-4. X-ray photoelectron spectroscopy (XPS)                                               | S5  |
| 2-5. High angle annular dark-field scanning transmission electron microscopy (HAADF-STEM) | S5  |
| 2-6. Dynamic light scattering (DLS)                                                       | S6  |
| 2-7. Transmission electron microscope (TEM)                                               | S6  |
| 2-8. Zeta potential                                                                       | S7  |
| <b>3. Extinction titrations</b>                                                           |     |
| 3-1. pH titration                                                                         | S7  |
| 3-2. Time dependency                                                                      | S8  |
| 3-3. Examples of amine detection                                                          | S9  |
| 3-4. Selectivity test                                                                     | S15 |
| <b>4. Evaluation of AuNP-based chemosensors with amines</b>                               |     |
| 4-1. Field emission scanning electron microscopy (FE-SEM)                                 | S19 |
| 4-2. Dynamic light scattering (DLS)                                                       | S20 |
| 4-3. Zeta potential                                                                       | S21 |
| 4-4. Elemental analysis                                                                   | S21 |
| <b>5. Array experiments</b>                                                               |     |
| 5-1. General procedure                                                                    | S21 |
| 5-2. Linear discriminant analysis (LDA)                                                   | S22 |
| 5-3. Regression analysis in mixtures: support vector machine (SVM)                        | S24 |
| <b>6. Raw fish analysis</b>                                                               |     |
| 6-1. High-performance liquid chromatography (HPLC) analysis                               | S25 |
| 6-2. Spike test using the chemosensor array                                               | S25 |

# 1. Characterization of AuNPs obtained by DS or IS

## 1-1. Extinction measurements

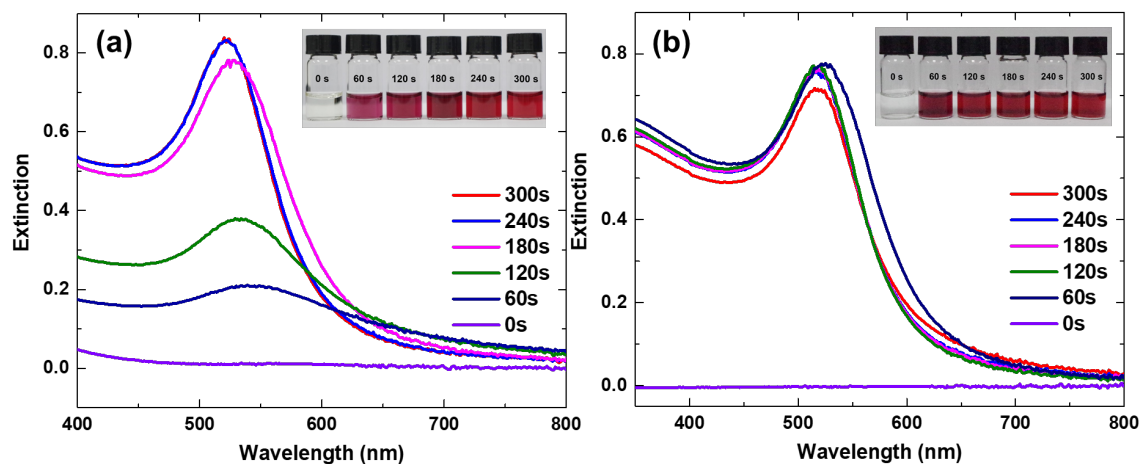

**Fig. S1** Extinction spectral changes of AuNPs obtained by (a) DS or (b) IS at various times for the reaction. The evaluation was carried out in H<sub>2</sub>O at 25 °C.

## 1-2. Transmission electron microscope (TEM)

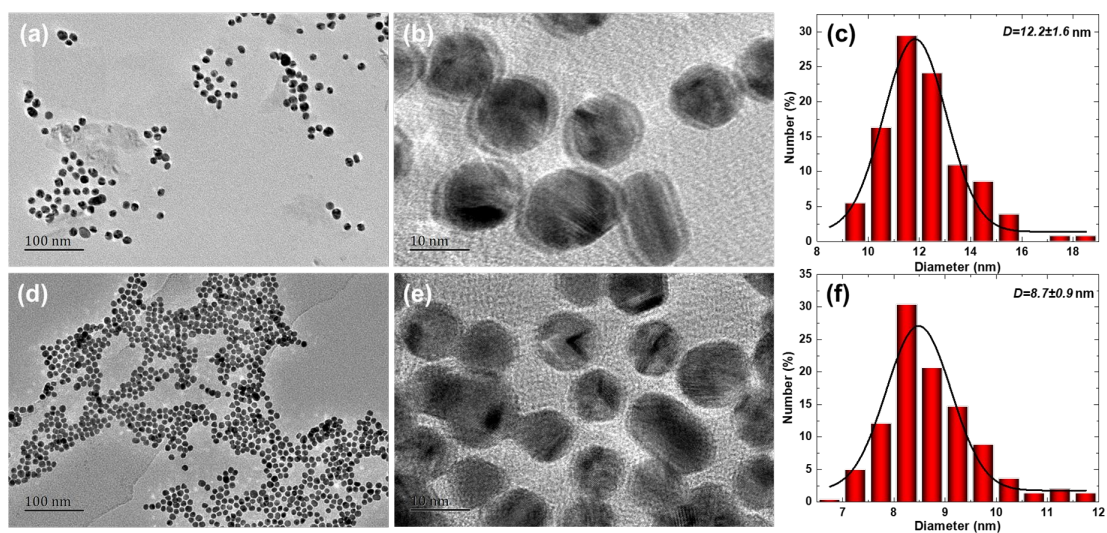

**Fig. S2** TEM images and particle size distribution of AuNPs prepared via different synthesis method [DS-AuNPs (a-c) and IS-AuNPs (d-f)].

## 2. Characterization of AuNP-based chemosensors

### 2-1. Extinction measurements

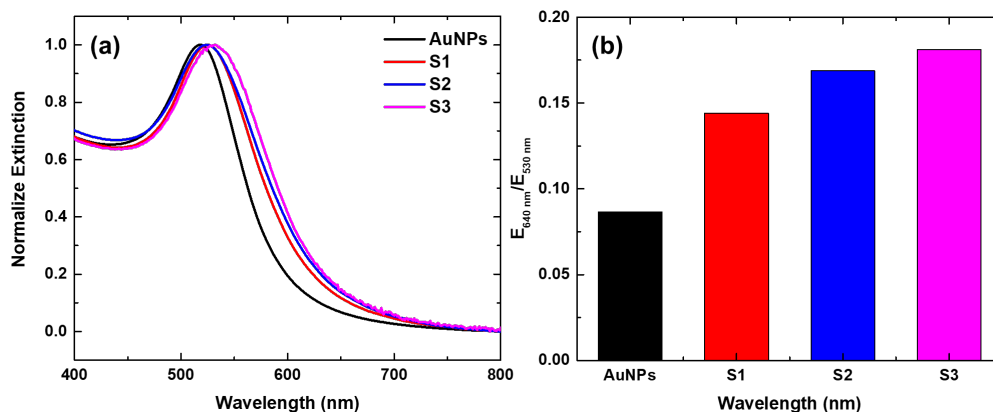

**Fig. S3** (a) Extinction spectra of untreated AuNPs (black line), and the functionalized AuNPs (**S1**: red line, **S2**: blue line, and **S3**: pink line) and (b) extinction at  $E_{640\text{ nm}}/E_{530\text{ nm}}$ . The evaluation was carried out in a MES buffer solution (10 mM) at pH 5.5 at 25 °C. [**S1–S3**] =  $1.2 \times 10^{-4}$  g mL $^{-1}$ .

### 2-2. FT-IR measurements

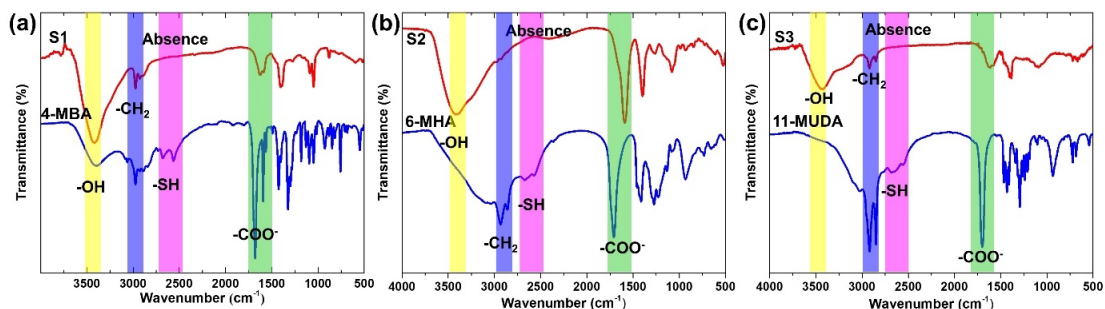

**Fig. S4** FT-IR (KBr pellet) spectra of (a) **S1** (red) and 4-mercaptobenzoic acid (4-MBA) (blue), (b) **S2** (red) and 6-mercaptohexanoic acid (6-MHA) (blue), and (c) **S3** (red) and 11-mercaptoundecanoic acid (11-MUDA) (blue).

### 2-3. Thermal gravimetric analysis (TGA)

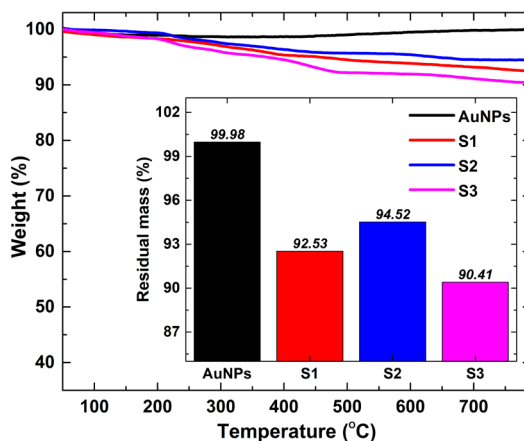

**Fig. S5** TGA profile of untreated AuNPs (black line), and the functionalized AuNPs (**S1**: red line, **S2**: blue line, and **S3**: pink line). Inset represents the char yield.

## 2-4. X-ray photoelectron spectroscopy (XPS)

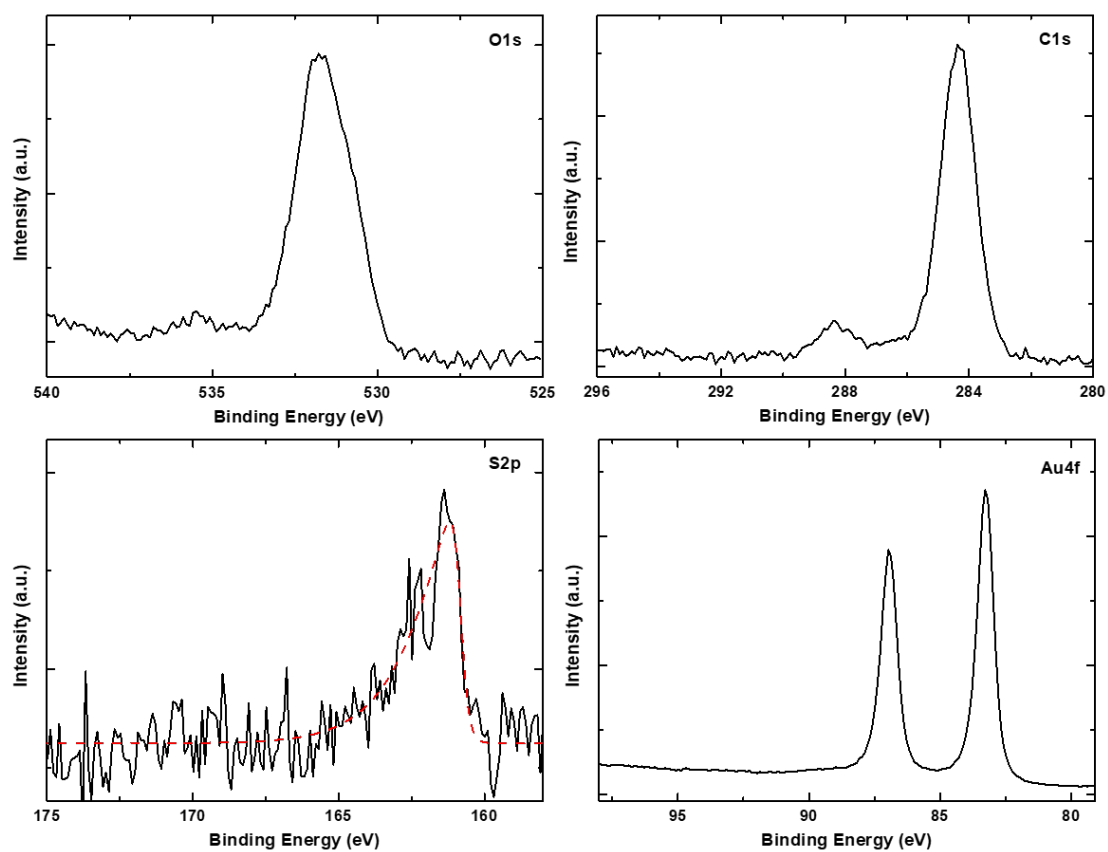

Fig. S6 XPS data of O1s, C1s, S2p, and Au4f peaks originating from S3.

## 2-5. High angle annular dark-field scanning transmission electron microscopy (HAADF-STEM)

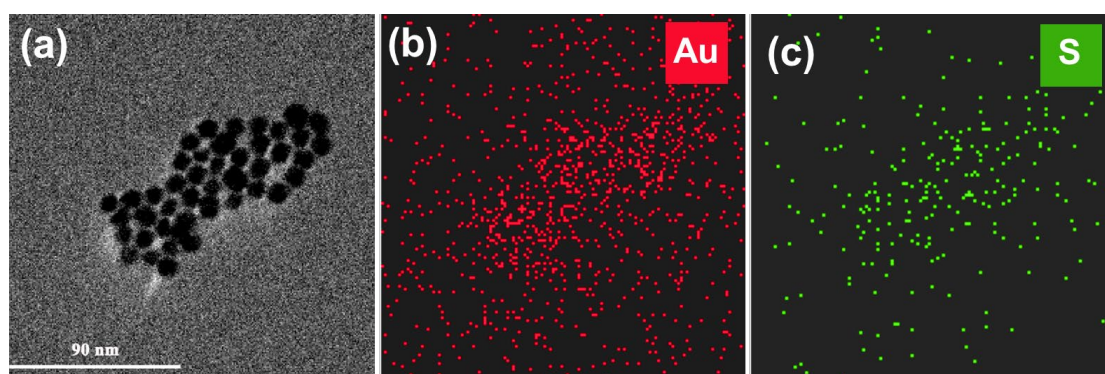

Fig. S7 (a) HAADF-STEM and EDX-mapping images of (b) Au and (c) S originating from S3.

## 2-6. Dynamic light scattering (DLS)

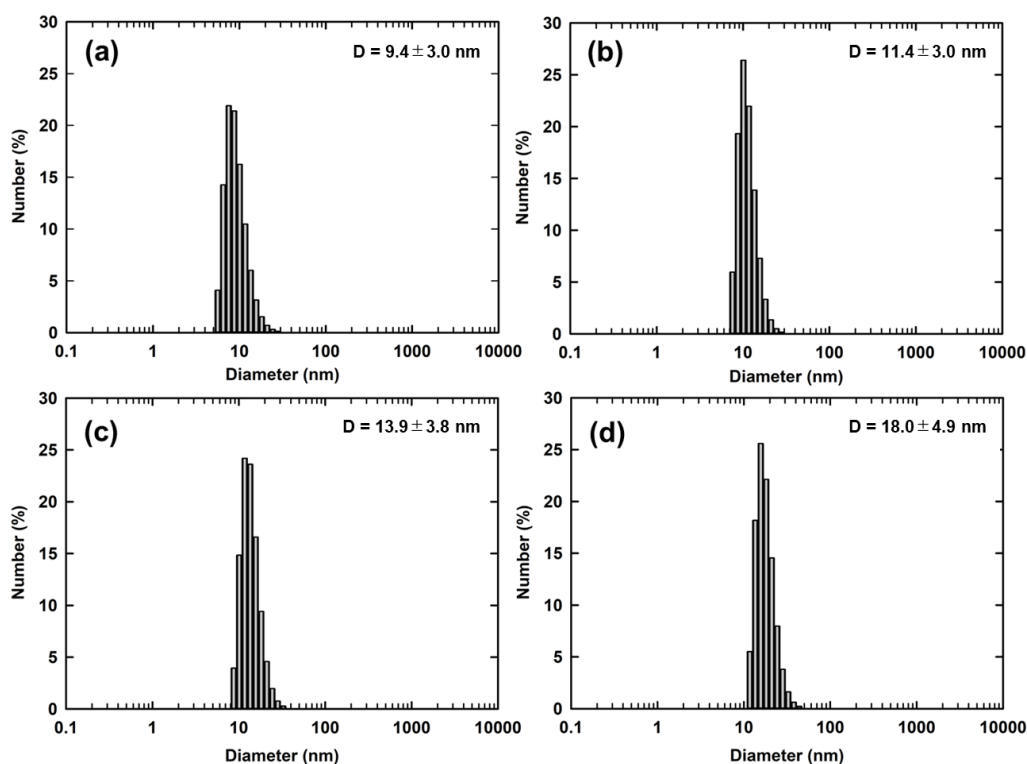

Fig. S8 The DLS diameter histograms of (a) untreated AuNPs, (b) S1, (c) S2 and (d) S3.

## 2-7. Transmission electron microscope (TEM)

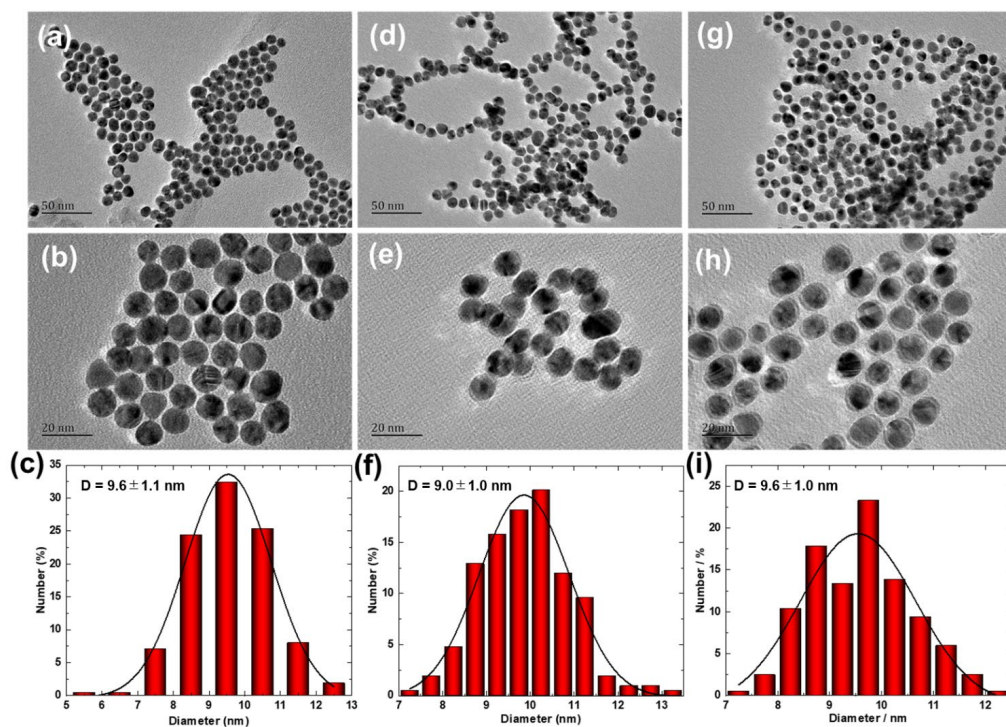

Fig. S9 Top: Morphological (TEM) characterization of AuNP-based chemosensors [S1 (a, b), S2 (d, e), and S3 (g, h)]. Bottom: the results of the size distribution measurements for (c) S1, (f) S2, and (i) S3.

## 2-8. Zeta potential

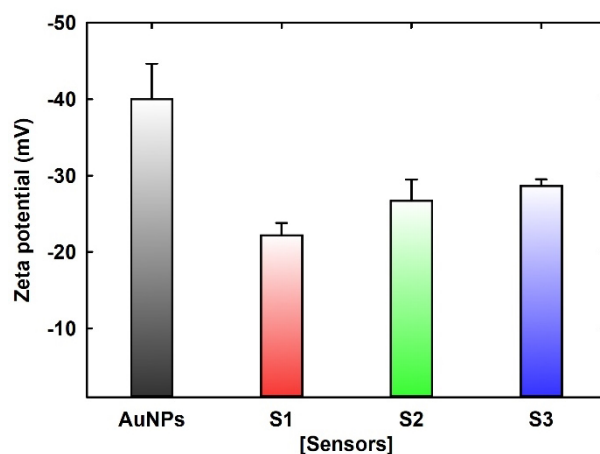

Fig. S10 Zeta potential histograms of untreated AuNPs and the functionalized AuNPs (S1, S2, and S3).

## 3. Extinction titrations

### 3-1. pH titration

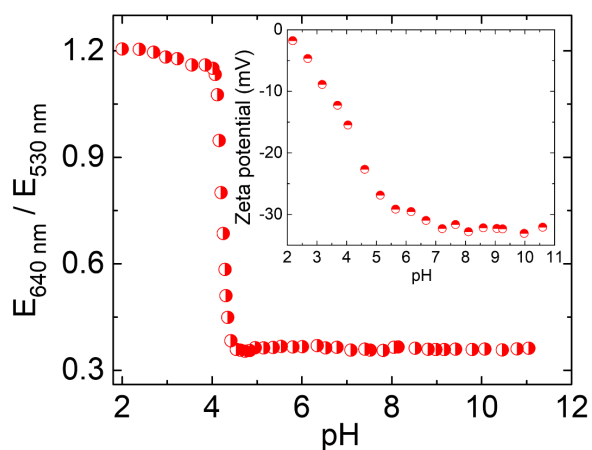

Fig. S11 The pH dependency of the colorimetric response of S2 ( $1.2 \times 10^{-4} \text{ g mL}^{-1}$ ) at  $E_{640 \text{ nm}}/E_{530 \text{ nm}}$ . Inset:  $\zeta$ -potential values of S2 at various pH conditions. The pH titration was carried out in the aqueous solution between pH 2.0 and pH 11 at 25 °C.

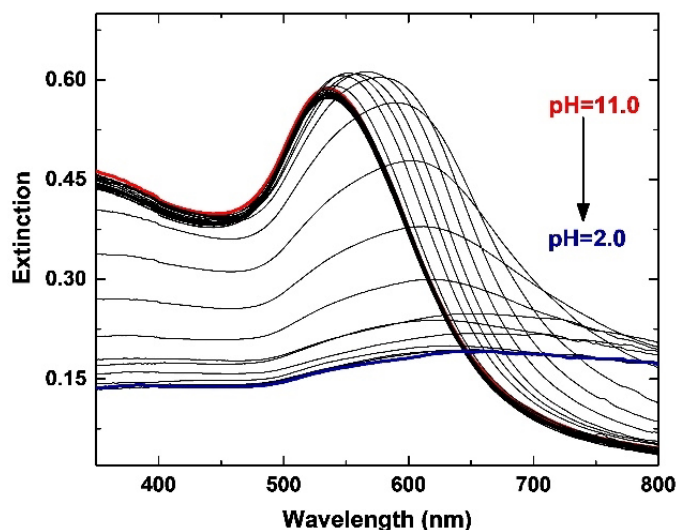

**Fig. S12** Changes of extinction spectra of **S2** ( $1.2 \times 10^{-4} \text{ g mL}^{-1}$ ) with dependence on pH changes. The pH titration was carried out in an aqueous solution at pH 2.0–11.0 at 25 °C.

### 3-2. Time-dependency

The time-dependent colorimetric changes of **S2** upon the addition of histamine were investigated by extinction spectral measurements. As shown in Fig. S13, the drastic extinction spectral shift of **S2** was observed by adding histamine within 2 min, which reached the maximum extinction intensity. After this period, the extinction spectra redshifted time-dependently and displayed an increase of the baseline accompanied with precipitation. The too-long incubation time caused precipitation, and subsequent strong Rayleigh scattering was not negligible. Thus, we decided to set 2 min as the incubation time to obtain spectral changes derived from the LSPR phenomena rather than Rayleigh scattering.

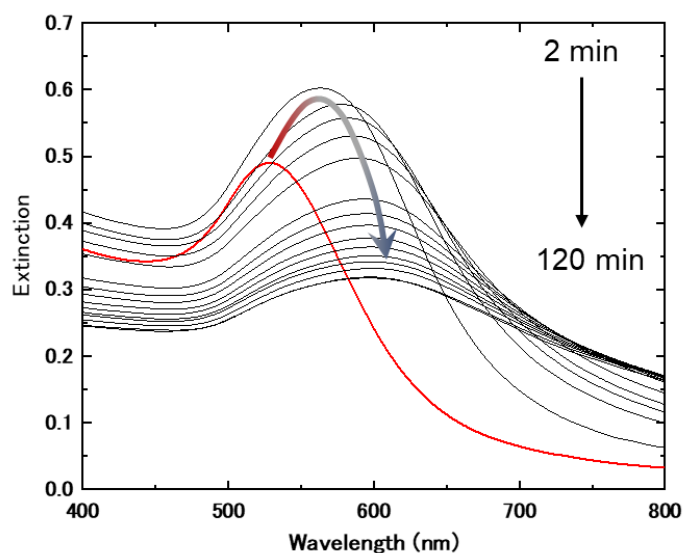

**Fig. S13** Time-dependency of extinction spectra of **S2** ( $1.2 \times 10^{-4} \text{ g mL}^{-1}$ ) with histamine (1.0 mM) in a MES buffer solution (10 mM) at pH 5.5 at 25 °C. The red line represents the spectrum of **S2** and the black lines represent the spectra of **S2** with histamine. The time-dependent spectral changes were recorded after 2, 6, 10, 15, 20, 30, 40, 50, 60, 70, 80, 90, 100, 110, and 120 min.



### 3-3. Examples of amine detection

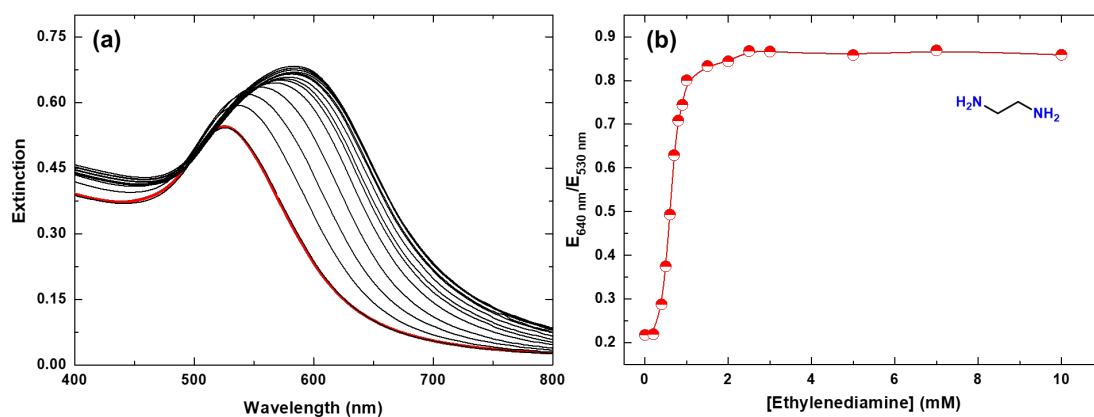

**Fig. S14** (a) The extinction spectra and (b) changes in the extinction ratio ( $E_{640\text{ nm}}/E_{530\text{ nm}}$ ) of **S2** ( $1.2 \times 10^{-4}\text{ g mL}^{-1}$ ) upon the addition of ethyldiamine in a MES buffer solution (10 mM) at pH 5.5 at 25 °C. [Ethyldiamine] = 0 – 10 mM.

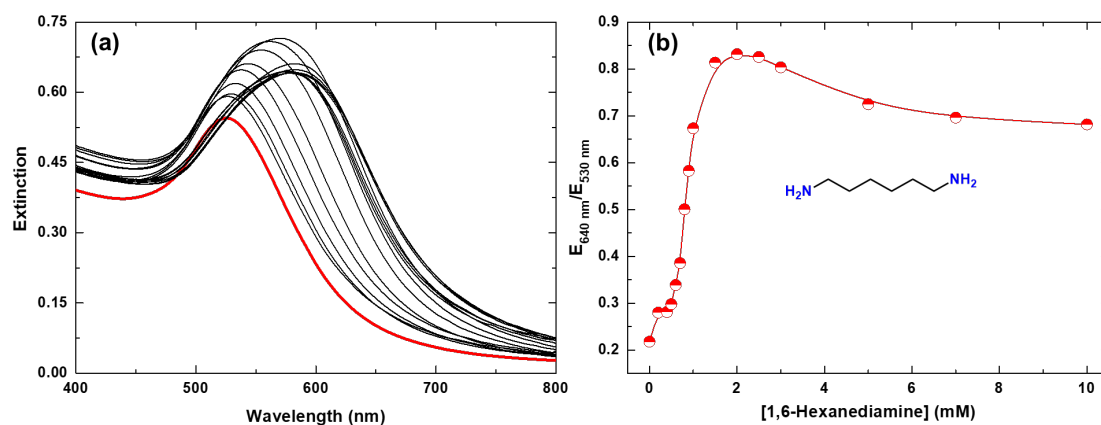

**Fig. S15** (a) The extinction spectra and (b) changes in the extinction ratio ( $E_{640\text{ nm}}/E_{530\text{ nm}}$ ) of **S2** ( $1.2 \times 10^{-4}\text{ g mL}^{-1}$ ) upon the addition of 1,6-hexanediamine in a MES buffer solution (10 mM) at pH 5.5 at 25 °C. [1,6-Hexanediamine] = 0 – 10 mM.

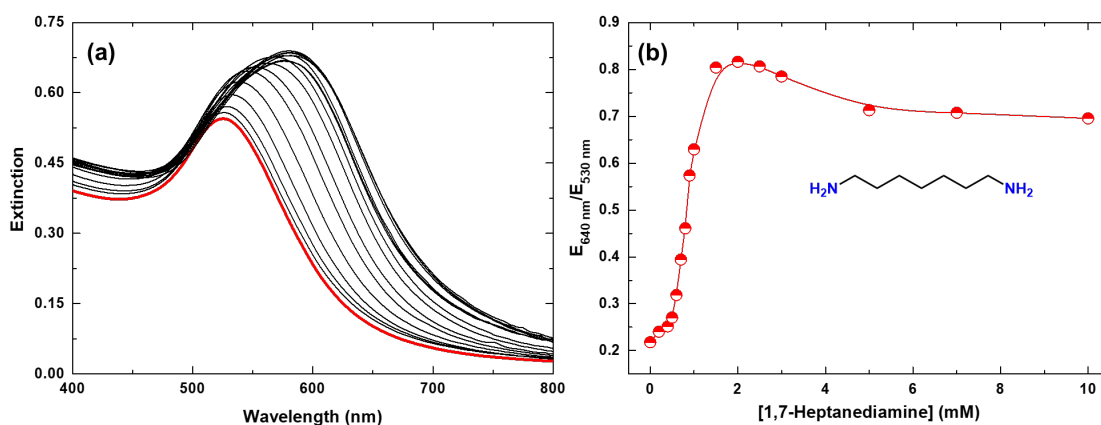

**Fig. S16** (a) The extinction spectra and (b) changes in the extinction ratio ( $E_{640\text{ nm}}/E_{530\text{ nm}}$ ) of **S2** ( $1.2 \times 10^{-4}\text{ g mL}^{-1}$ ) upon the addition of 1,7-heptanediamine in a MES buffer solution (10 mM) at pH 5.5 at 25 °C. [1,7-Heptanediamine] = 0 – 10 mM.

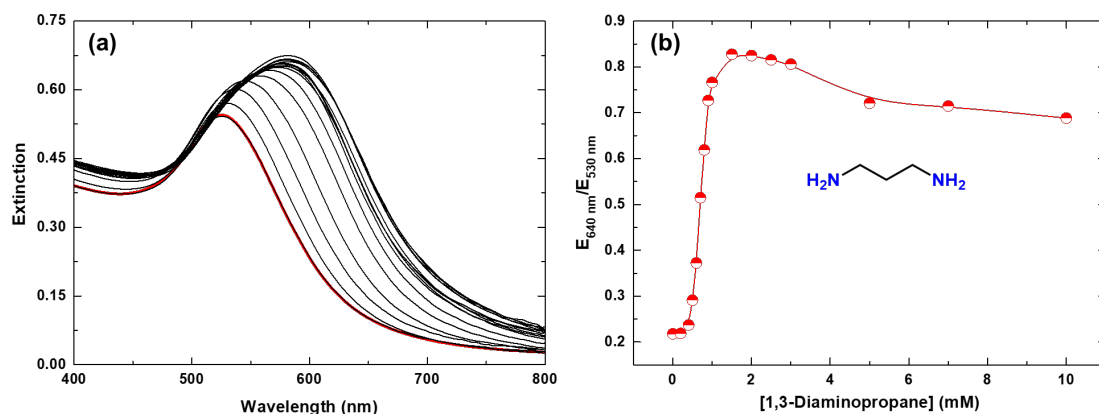

**Fig. S17** (a) The extinction spectra and (b) changes in the extinction ratio ( $E_{640\text{ nm}}/E_{530\text{ nm}}$ ) of **S2** ( $1.2 \times 10^{-4}\text{ g mL}^{-1}$ ) upon the addition of 1,3-diaminopropane in a MES buffer solution (10 mM) at pH 5.5 at 25 °C. [1,3-Diaminopropane] = 0 – 10 mM.

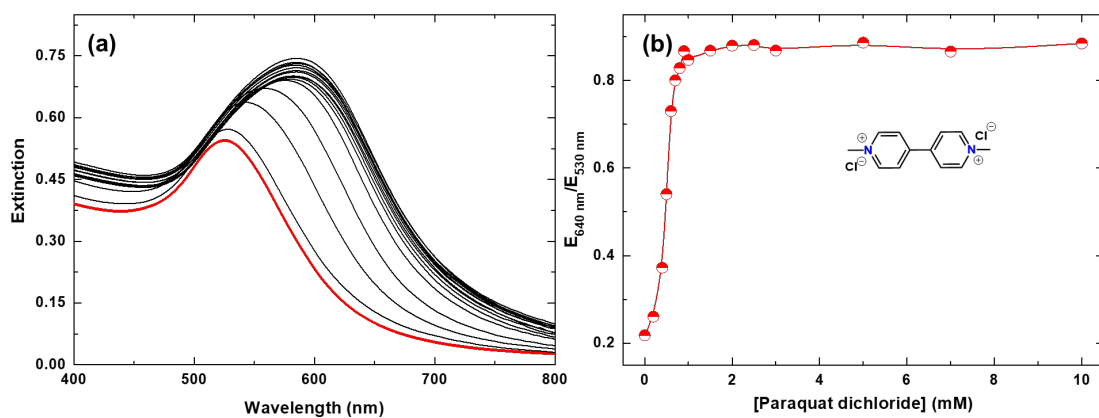

**Fig. S18** (a) The extinction spectra and (b) changes in the extinction ratio ( $E_{640\text{ nm}}/E_{530\text{ nm}}$ ) of **S2** ( $1.2 \times 10^{-4}\text{ g mL}^{-1}$ ) upon the addition of paraquat dichloride in a MES buffer solution (10 mM) at pH 5.5 at 25 °C. [Paraquat dichloride] = 0 – 10 mM.

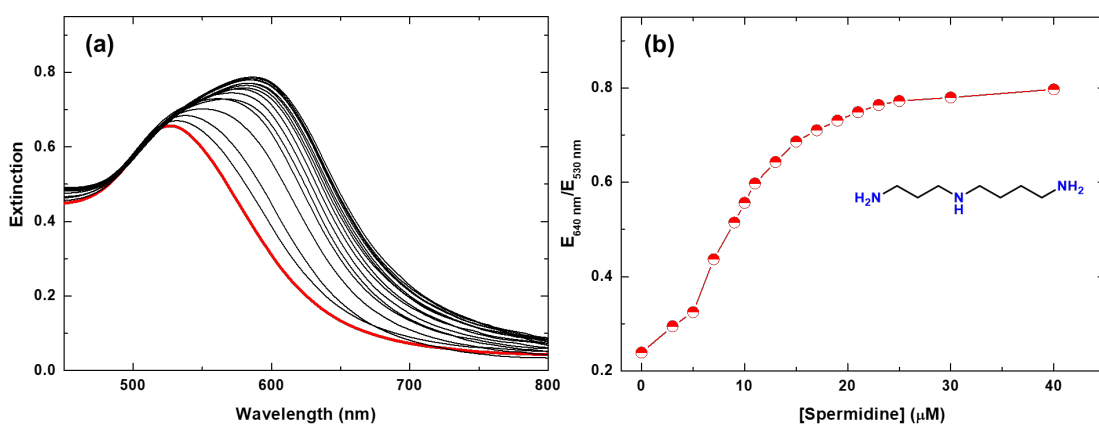

**Fig. S19** (a) The extinction spectra and (b) changes in the extinction ratio ( $E_{640\text{ nm}}/E_{530\text{ nm}}$ ) of **S2** ( $1.2 \times 10^{-4}\text{ g mL}^{-1}$ ) upon the addition of spermidine in a MES buffer solution (10 mM) at pH 5.5 at 25 °C. [Spermidine] = 0 – 40 μM.

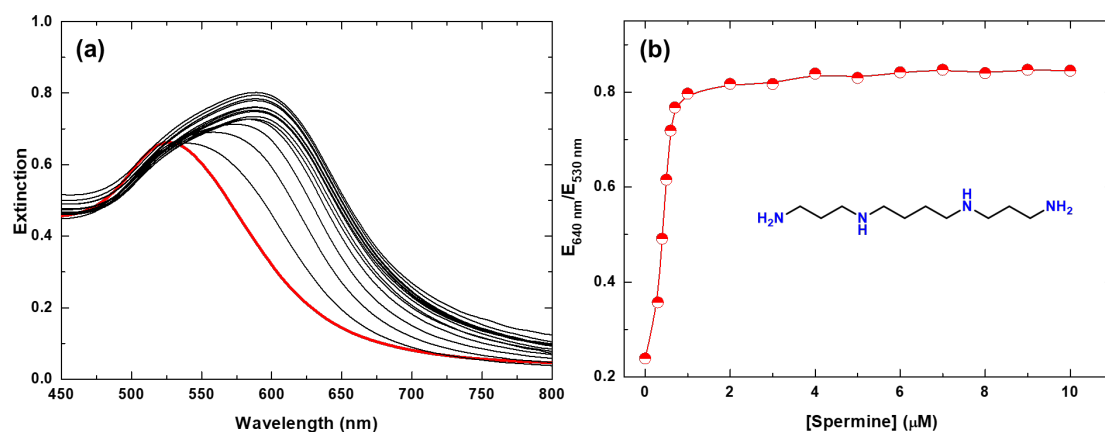

**Fig. S20** (a) The extinction spectra and (b) changes in the extinction ratio ( $E_{640 \text{ nm}}/E_{530 \text{ nm}}$ ) of **S2** ( $1.2 \times 10^{-4} \text{ g mL}^{-1}$ ) upon the addition of spermine in a MES buffer solution (10 mM) at pH 5.5 at 25 °C. [Spermine] = 0 – 10  $\mu\text{M}$ .

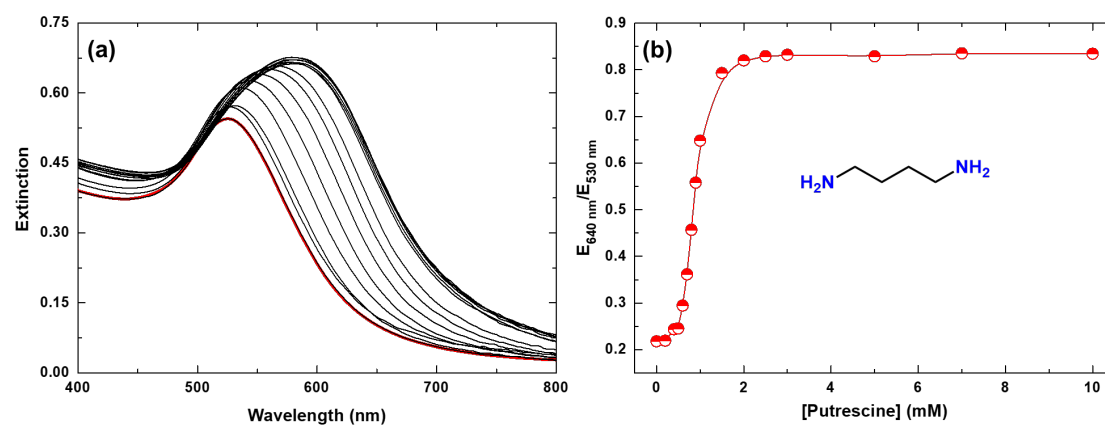

**Fig. S21** (a) The extinction spectra and (b) changes in the extinction ratio ( $E_{640 \text{ nm}}/E_{530 \text{ nm}}$ ) of **S2** ( $1.2 \times 10^{-4} \text{ g mL}^{-1}$ ) upon the addition of putrescine in a MES buffer solution (10 mM) at pH 5.5 at 25 °C. [Putrescine] = 0 – 10 mM.

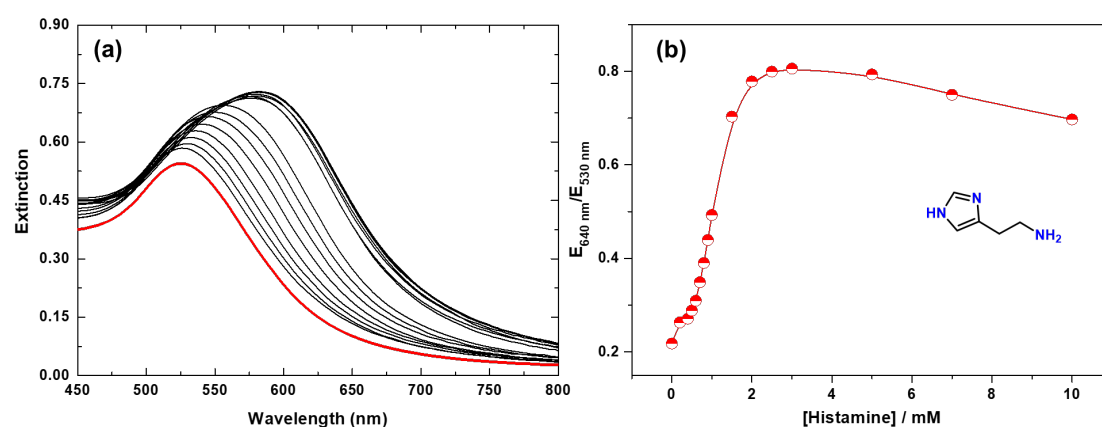

**Fig. S22** (a) The extinction spectra and (b) changes in the extinction ratio ( $E_{640 \text{ nm}}/E_{530 \text{ nm}}$ ) of **S2** ( $1.2 \times 10^{-4} \text{ g mL}^{-1}$ ) upon the addition of histamine in a MES buffer solution (10 mM) at pH 5.5 at 25 °C. [Histamine] = 0 – 10 mM.

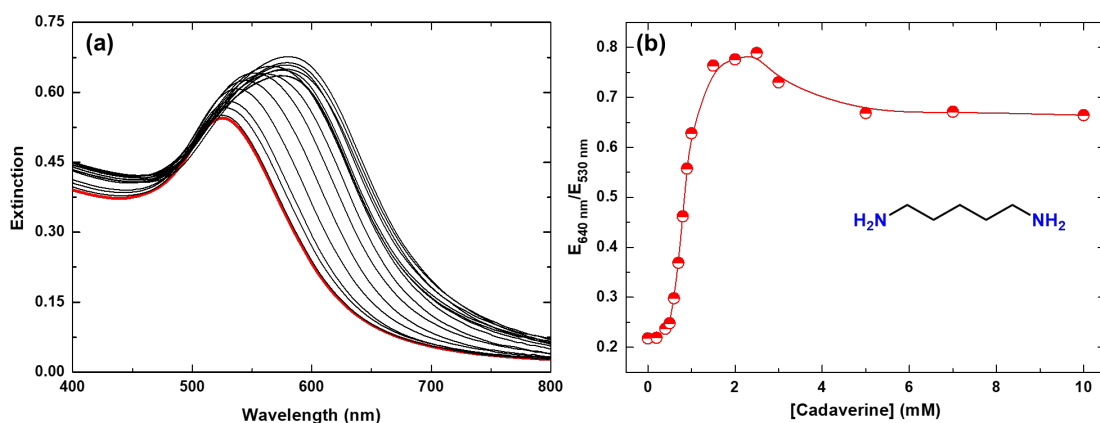

**Fig. S23** (a) The extinction spectra and (b) changes in the extinction ratio ( $E_{640 \text{ nm}}/E_{530 \text{ nm}}$ ) of **S2** ( $1.2 \times 10^{-4} \text{ g mL}^{-1}$ ) upon the addition of cadaverine in a MES buffer solution (10 mM) at pH 5.5 at 25 °C. [Cadaverine] = 0 – 10 mM.

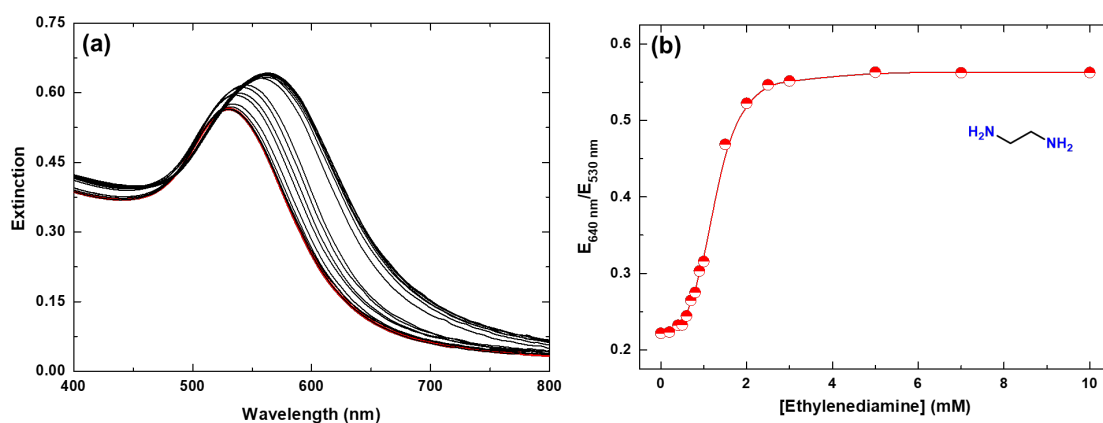

**Fig. S24** (a) The extinction spectra and (b) changes in the extinction ratio ( $E_{640 \text{ nm}}/E_{530 \text{ nm}}$ ) of **S3** ( $1.2 \times 10^{-4} \text{ g mL}^{-1}$ ) upon the addition of ethylenediamine in a MES buffer solution (10 mM) at pH 5.5 at 25 °C. [Ethylenediamine] = 0 – 10 mM.

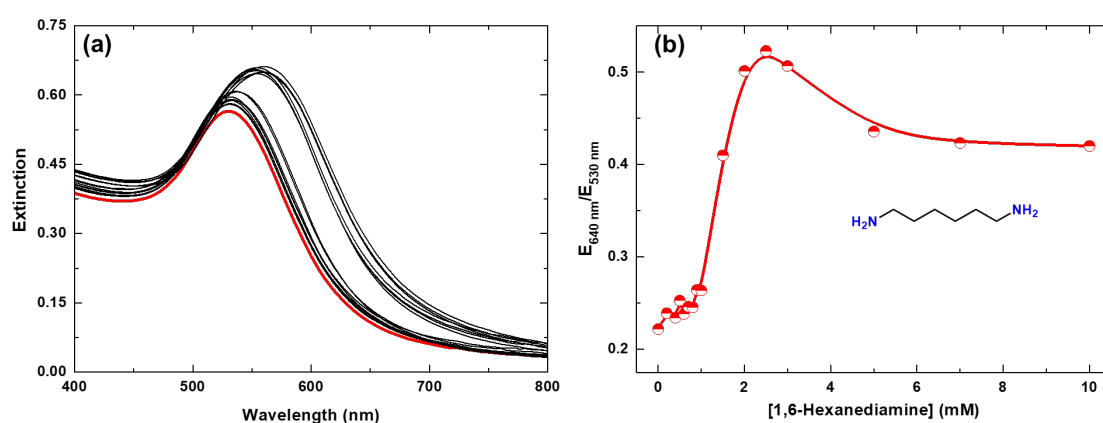

**Fig. S25** (a) The extinction spectra and (b) changes in the extinction ratio ( $E_{640 \text{ nm}}/E_{530 \text{ nm}}$ ) of **S3** ( $1.2 \times 10^{-4} \text{ g mL}^{-1}$ ) upon the addition of 1,6-hexanediamine in a MES buffer solution (10 mM) at pH 5.5 at 25 °C. [1,6-Hexanediamine] = 0 – 10 mM.

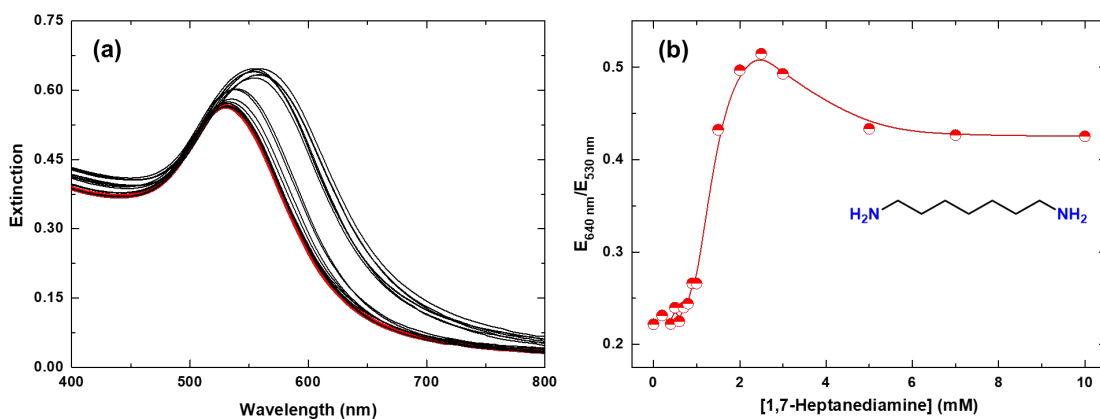

**Fig. S26** (a) The extinction spectra and (b) changes in the extinction ratio ( $E_{640 \text{ nm}}/E_{530 \text{ nm}}$ ) of **S3** ( $1.2 \times 10^{-4} \text{ g mL}^{-1}$ ) upon the addition of 1,7-heptanediamine in a MES buffer solution (10 mM) at pH 5.5 at 25 °C. [1,7-Heptanediamine] = 0 – 10 mM.

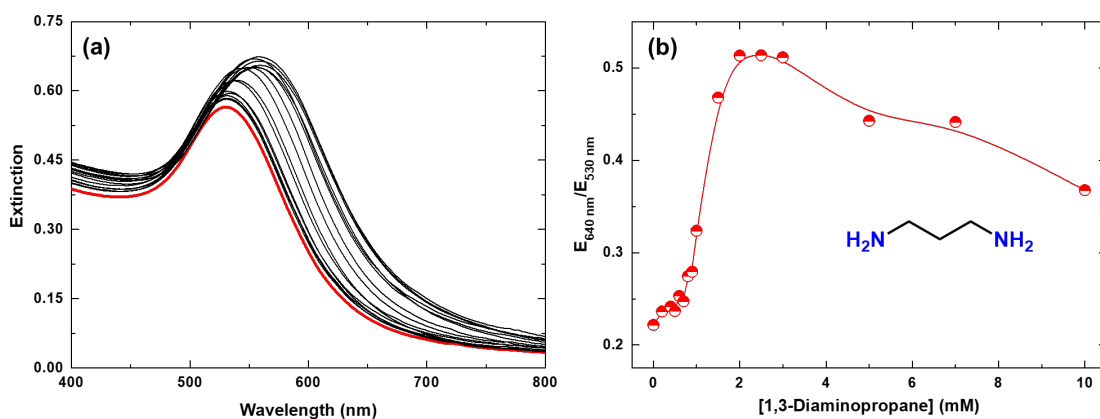

**Fig. S27** (a) The extinction spectra and (b) changes in the extinction ratio ( $E_{640 \text{ nm}}/E_{530 \text{ nm}}$ ) of **S3** ( $1.2 \times 10^{-4} \text{ g mL}^{-1}$ ) upon the addition of 1,3-diaminopropane in a MES buffer solution (10 mM) at pH 5.5 at 25 °C. [1,3-Diaminopropane] = 0 – 10 mM.

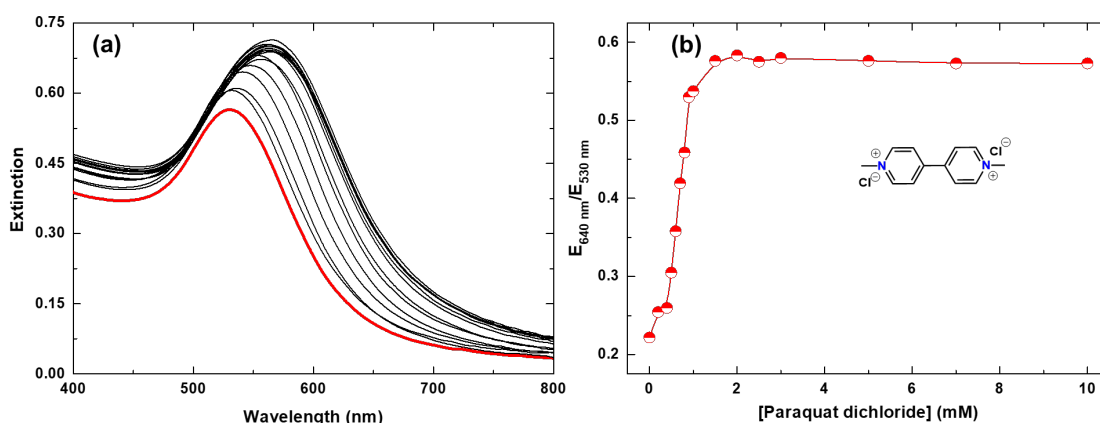

**Fig. S28** (a) The extinction spectra and (b) changes in the extinction ratio ( $E_{640 \text{ nm}}/E_{530 \text{ nm}}$ ) of **S3** ( $1.2 \times 10^{-4} \text{ g mL}^{-1}$ ) upon the addition of paraquat dichloride in a MES buffer solution (10 mM) at pH 5.5 at 25 °C. [Paraquat dichloride] = 0 – 10 mM.

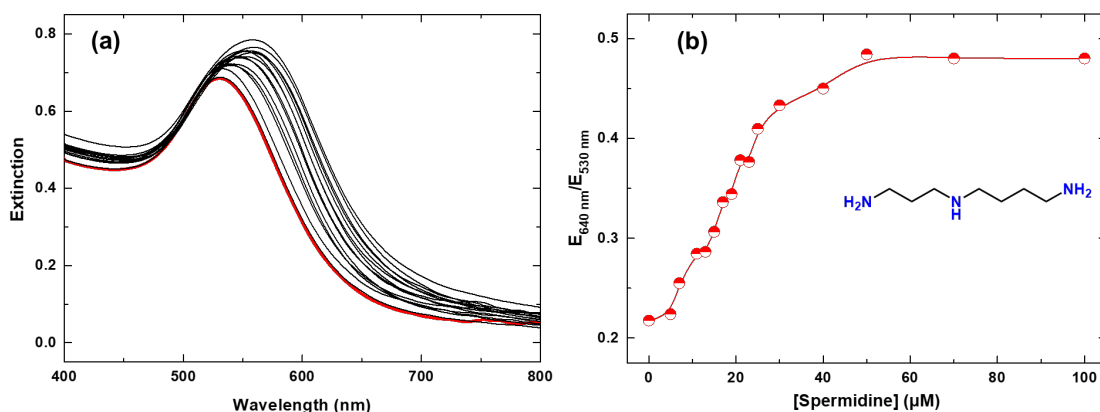

**Fig. S29** (a) The extinction spectra and (b) changes in the extinction ratio ( $E_{640 \text{ nm}}/E_{530 \text{ nm}}$ ) of **S3** ( $1.2 \times 10^{-4} \text{ g mL}^{-1}$ ) upon the addition of spermidine in a MES buffer solution (10 mM) at pH 5.5 at 25 °C. [Spermidine] = 0 – 100 μM.

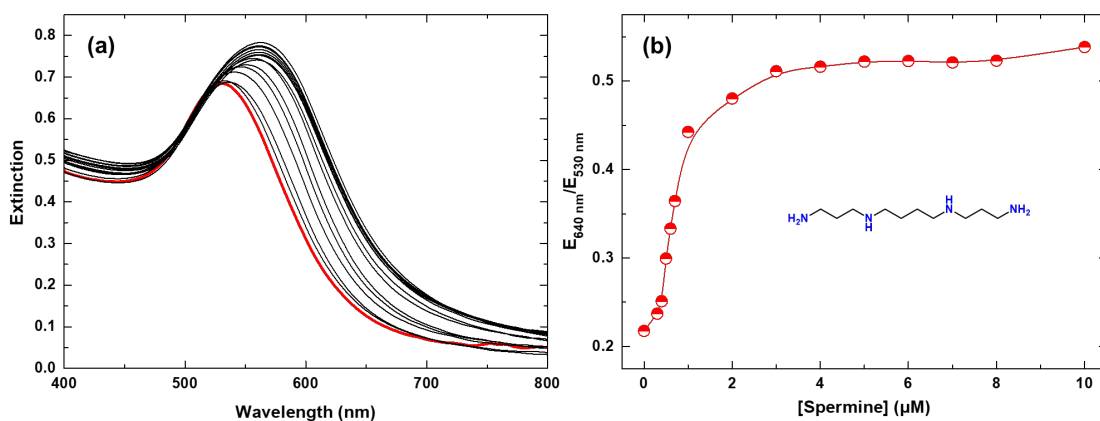

**Fig. S30** (a) The extinction spectra and (b) changes in the extinction ratio ( $E_{640 \text{ nm}}/E_{530 \text{ nm}}$ ) of **S3** ( $1.2 \times 10^{-4} \text{ g mL}^{-1}$ ) upon the addition of spermine in a MES buffer solution (10 mM) at pH 5.5 at 25 °C. [Spermine] = 0 – 10 μM.

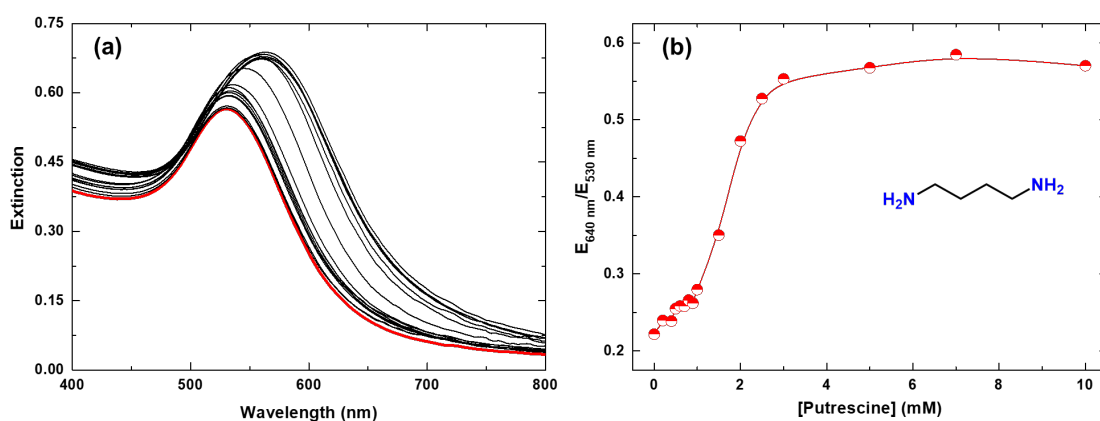

**Fig. S31** (a) The extinction spectra and (b) changes in the extinction ratio ( $E_{640 \text{ nm}}/E_{530 \text{ nm}}$ ) of **S3** ( $1.2 \times 10^{-4} \text{ g mL}^{-1}$ ) upon the addition of putrescine in a MES buffer solution (10 mM) at pH 5.5 at 25 °C. [Putrescine] = 0 – 10 mM.

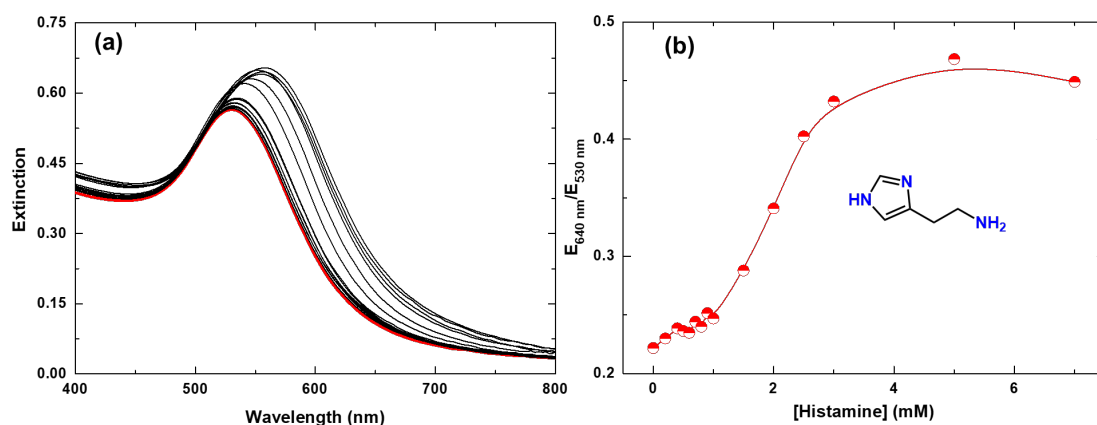

**Fig. S32** (a) The extinction spectra and (b) changes in the extinction ratio ( $E_{640 \text{ nm}}/E_{530 \text{ nm}}$ ) of **S3** ( $1.2 \times 10^{-4} \text{ g mL}^{-1}$ ) upon the addition of histamine in a MES buffer solution (10 mM) at pH 5.5 at 25 °C. [Histamine] = 0 – 7 mM.

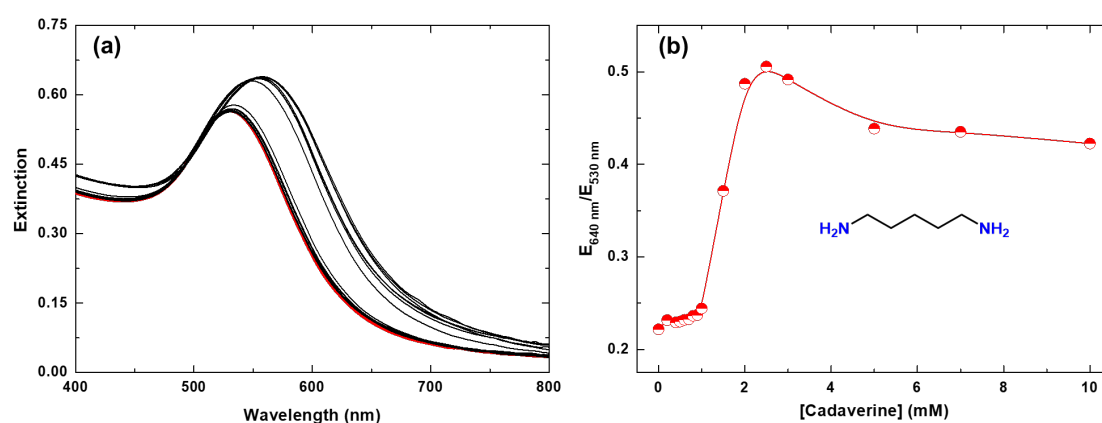

**Fig. S33** (a) The extinction spectra and (b) changes in the extinction ratio ( $E_{640 \text{ nm}}/E_{530 \text{ nm}}$ ) of **S3** ( $1.2 \times 10^{-4} \text{ g mL}^{-1}$ ) upon the addition of cadaverine in a MES buffer solution (10 mM) at pH 5.5 at 25 °C. [Cadaverine] = 0 – 10 mM.

### 3-4. Selectivity test

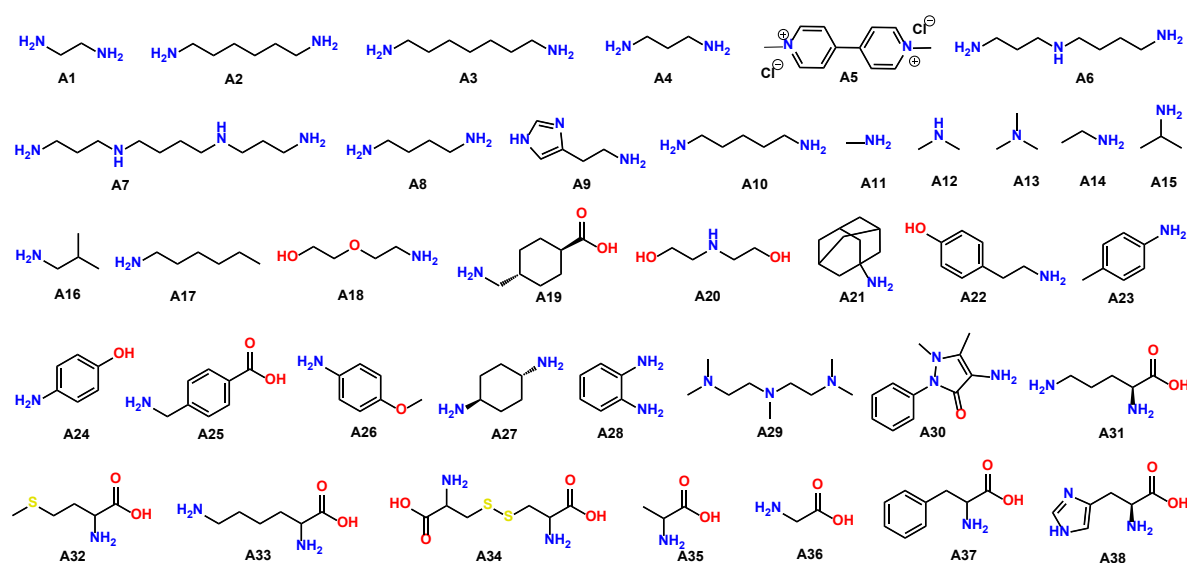

**Fig. S34** List of target amines for the selectivity test.

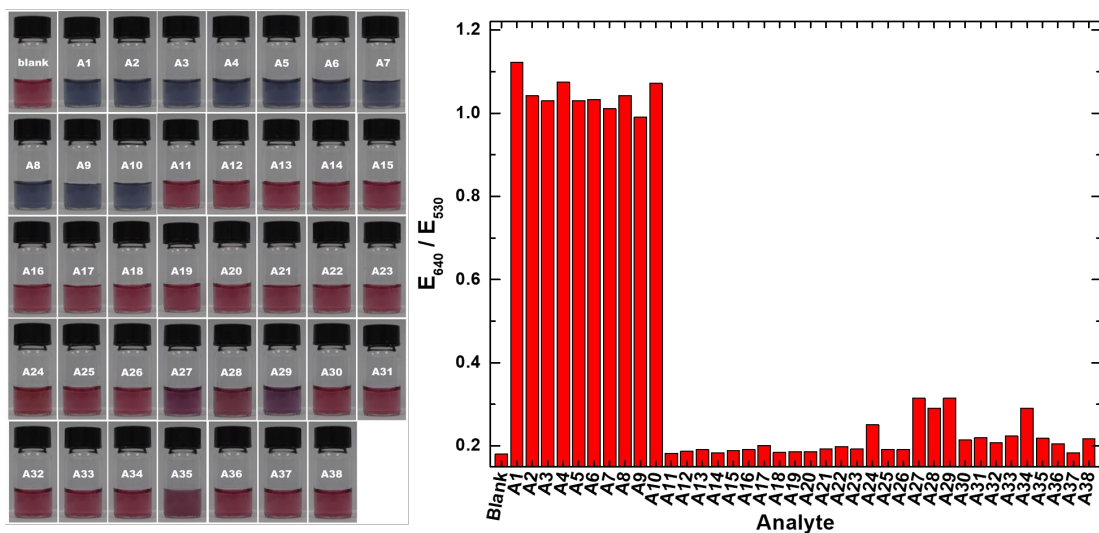

**Fig. S35** (a) Photographs of **S1** ( $1.2 \times 10^{-4}$  g mL $^{-1}$ ) and with analytes. (b) Changes in the extinction ratio ( $E_{640\text{ nm}}/E_{530\text{ nm}}$ ) of **S1** upon the addition of analytes in a MES buffer solution (10 mM) at pH 5.5 at 25 °C. [Analyte] = 3 mM.

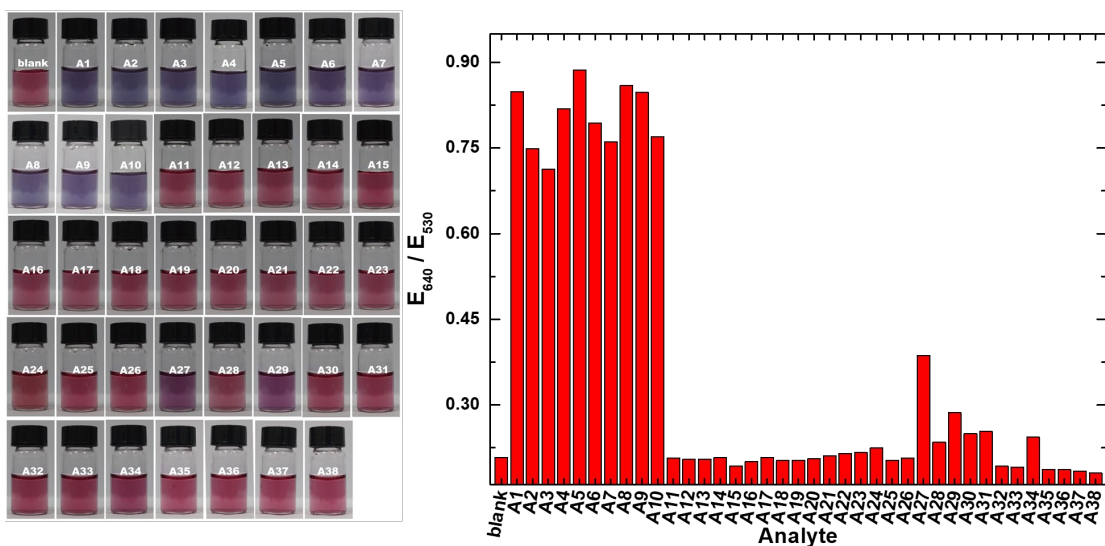

**Fig. S36** (a) Photographs of **S2** ( $1.2 \times 10^{-4}$  g mL $^{-1}$ ) and with analytes. (b) Changes in the extinction ratio ( $E_{640\text{ nm}}/E_{530\text{ nm}}$ ) of **S2** upon the addition of analytes in a MES buffer solution (10 mM) at pH 5.5 at 25 °C. [Analyte] = 3 mM.



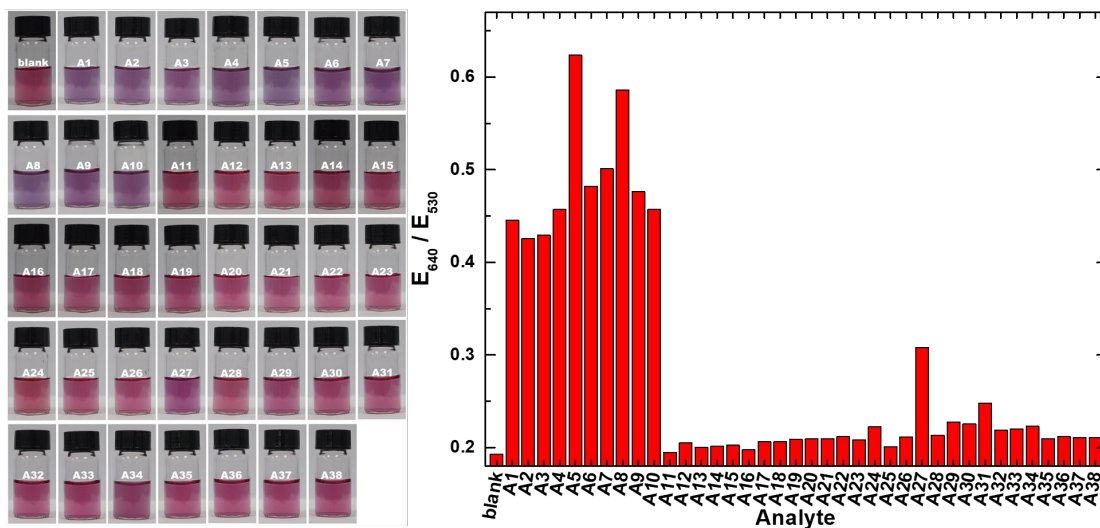

**Fig. S37** (a) Photographs of **S3** ( $1.2 \times 10^{-4} \text{ g mL}^{-1}$ ) and with analytes. (b) Changes in the extinction ratio ( $E_{640 \text{ nm}}/E_{530 \text{ nm}}$ ) of **S3** upon the addition of analytes in a MES buffer solution (10 mM) at pH 5.5 at 25 °C. [Analyte] = 3 mM.

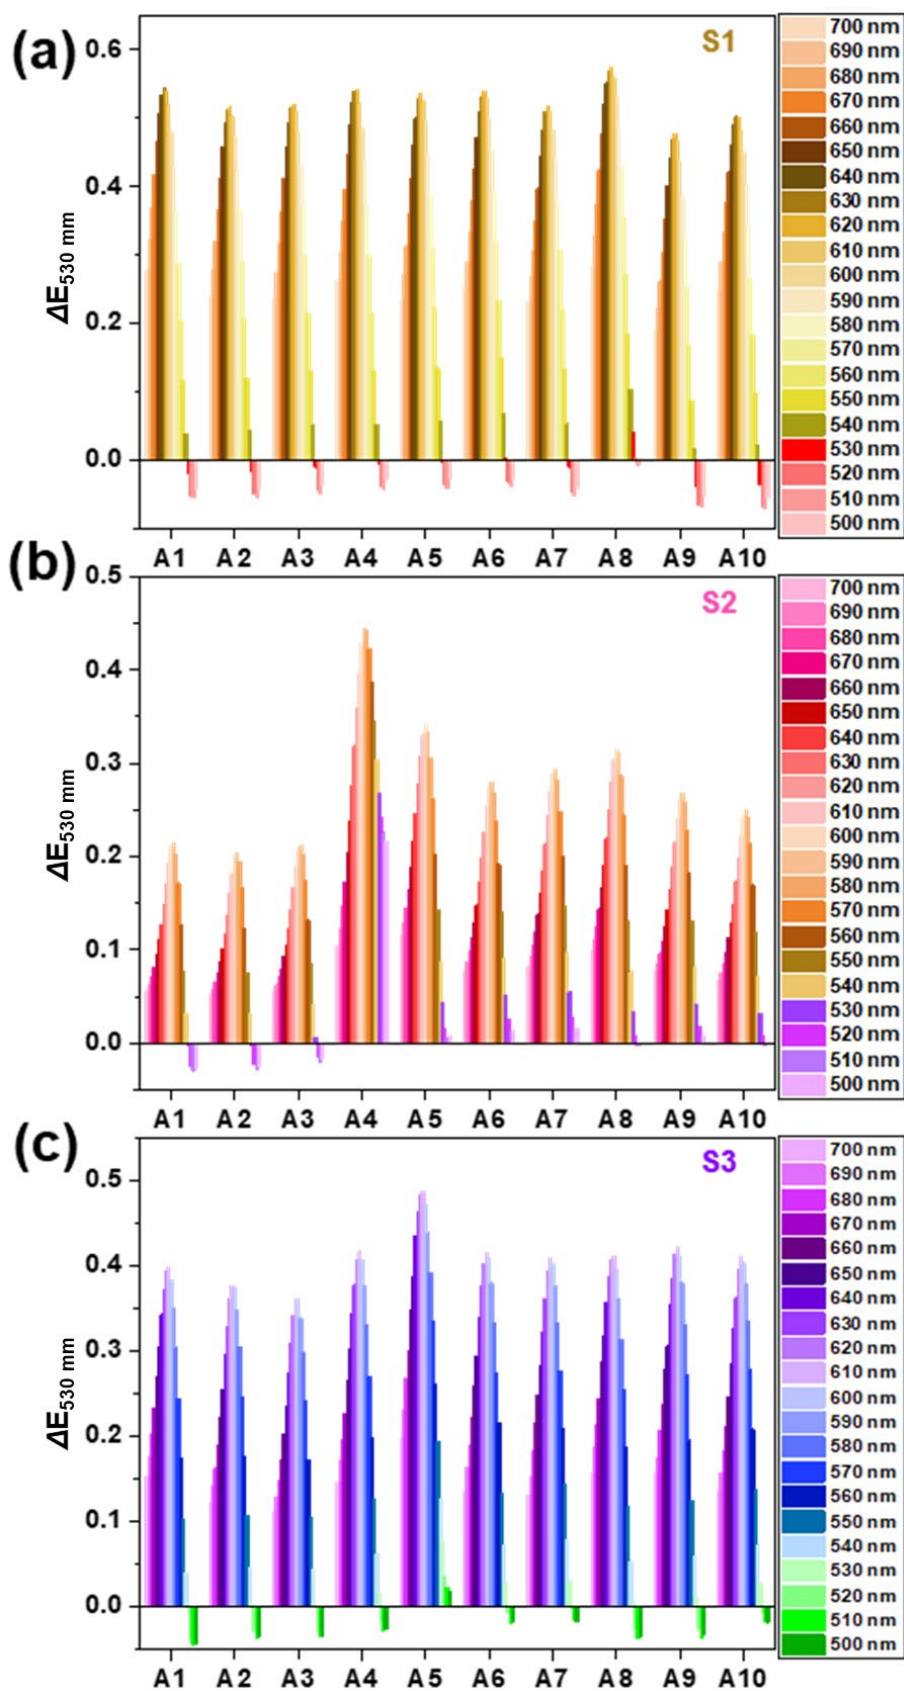

**Fig. S38** Cross-reactive response pattern generated by **S1**, **S2** and **S3** using 41 wavelengths in the presence of amines (**A1**–**A10**) in a MES buffer solution (10 mM) at pH 5.5 at 25 °C. [**S1**–**S3**] =  $1.2 \times 10^{-4}$  g mL<sup>-1</sup>, [analyte] = 3 mM.

## 4. Evaluation of AuNP-based chemosensors with amines

### 4-1. Field emission scanning electron microscopy (FE-SEM)

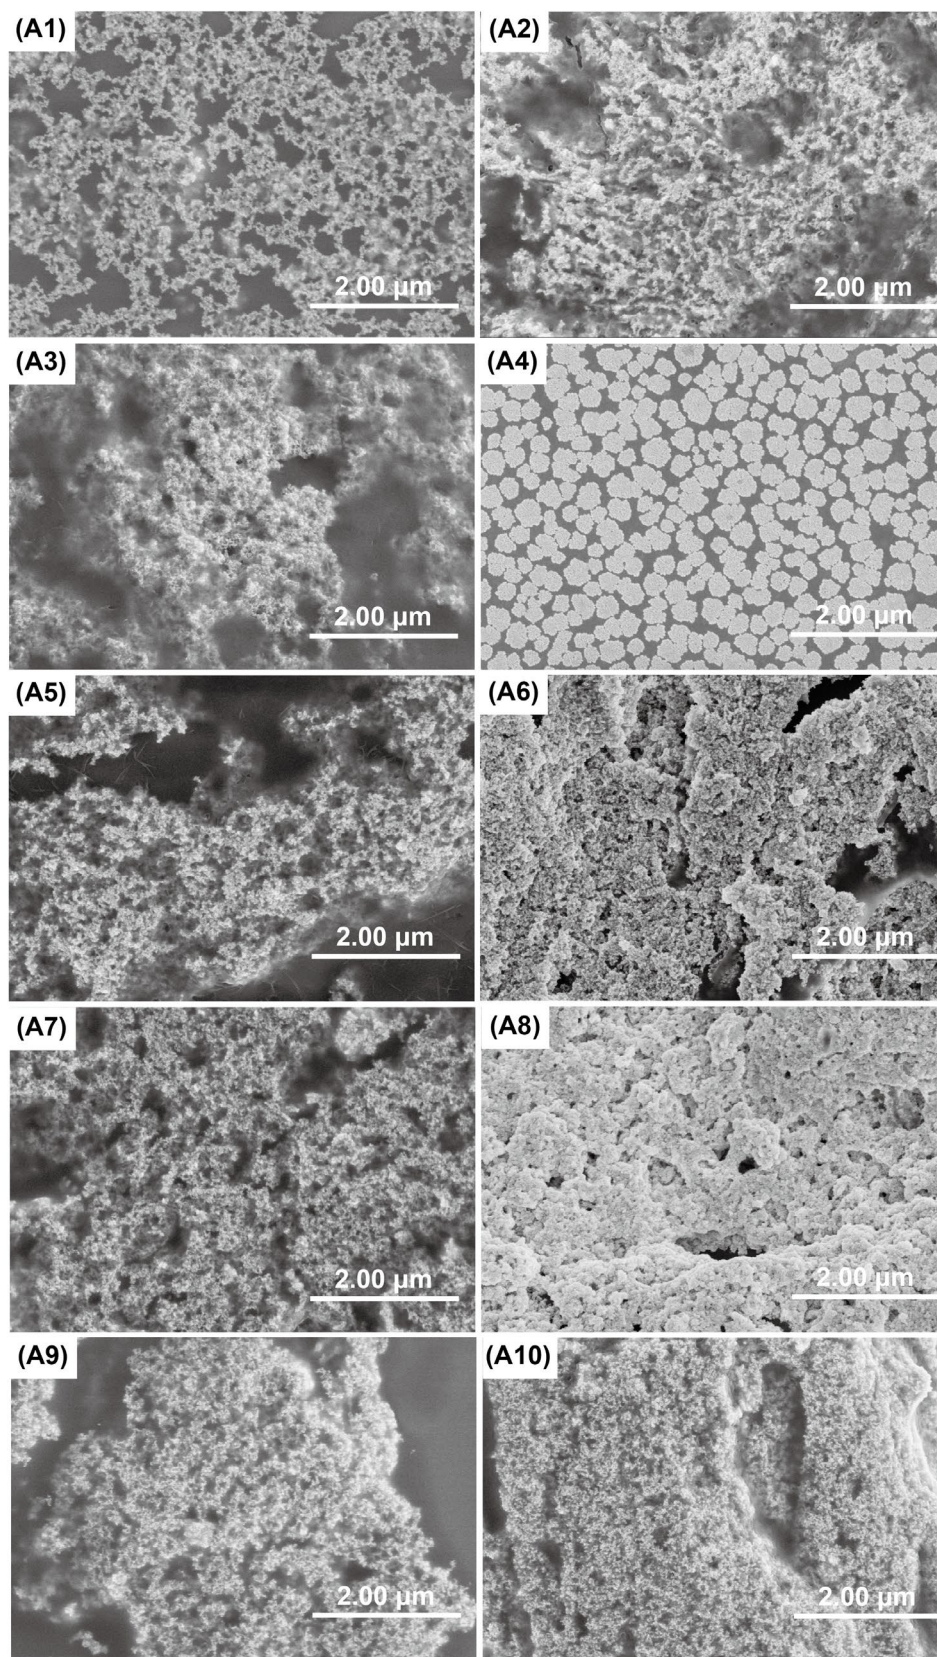

**Fig. S39** The FE-SEM microphotographs of **S2** after adding different analytes.

## 4-2. Dynamic light scattering (DLS)

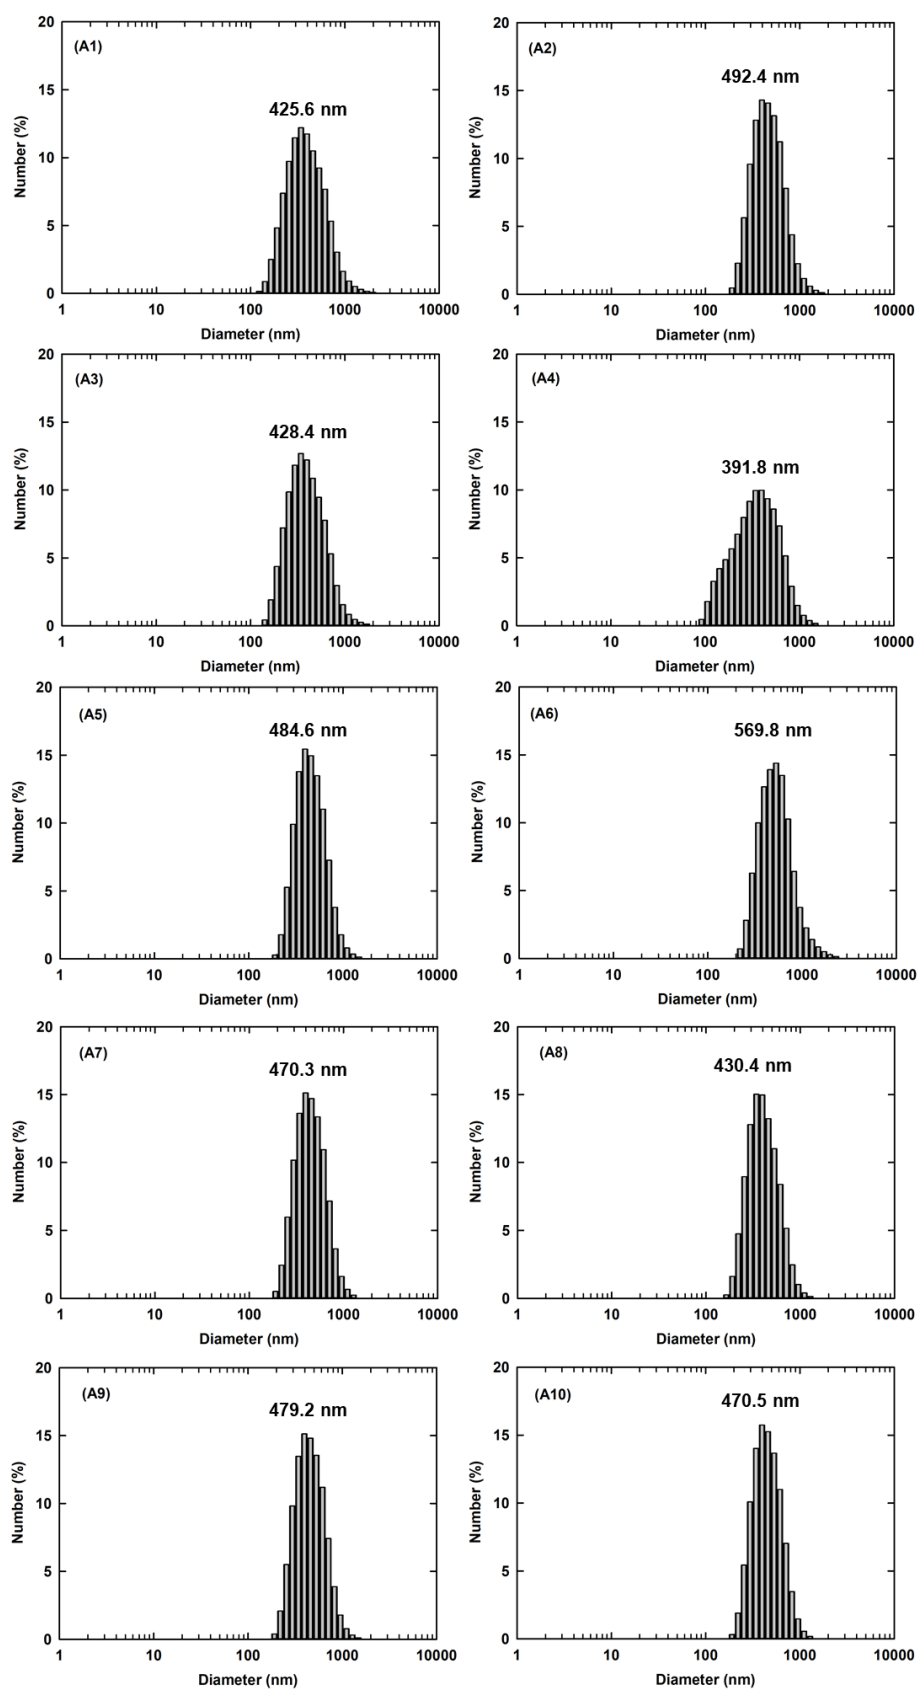

**Fig. S40** The DLS diameter histogram of **S2** after adding different analytes (blank, **A1–A10**). [Analyte] = 3 mM.

### 4-3. Zeta potential

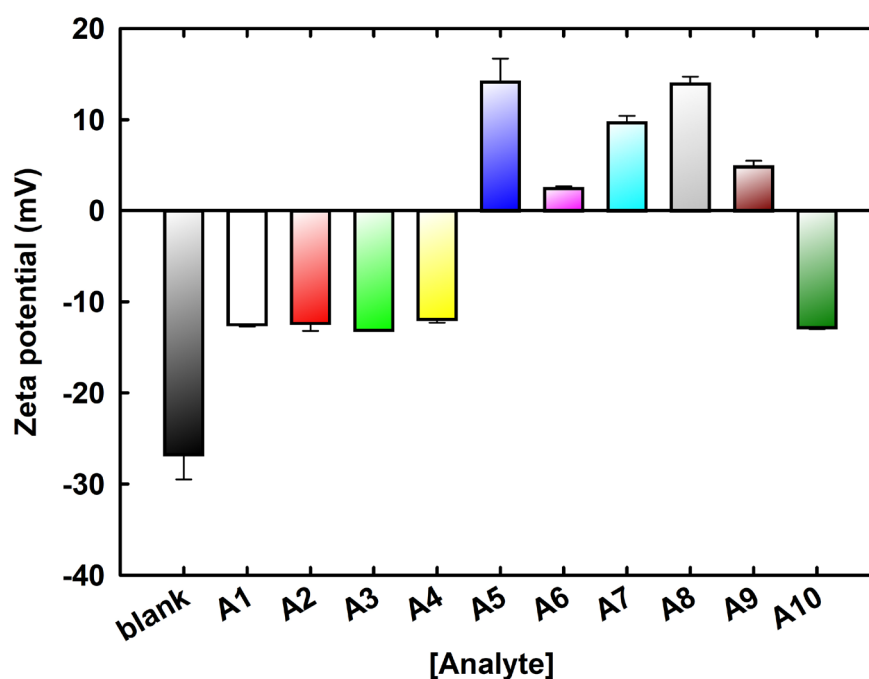

**Fig. S41** The Zeta potential of **S2** after adding different analytes (blank, **A1–A10**). [Analyte] = 3 mM. All experiments were repeated three times.

### 4-4. Elemental analysis

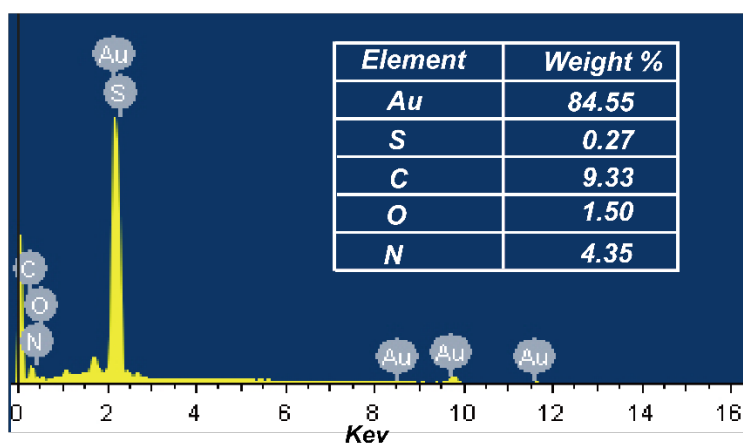

**Fig. S42** The EDX profile of **S2** after adding **A9**.

## 5. Array experiments

### 5-1. General procedure

The array experiments for qualitative and quantitative analyses were performed in 96-well microplates using a Beckman BioRAPTR microfluidic robotic dispenser. The fluids [MES buffer (10 mM) at pH 5.5 at 25 °C], AuNP sensors (**S1–S3**) ( $1.2 \times 10^{-4} \text{ g mL}^{-1}$ ), and analyte solutions were contact-free dispensed as follows. Each experiment was performed in 24 repetitions. Each well received 135  $\mu\text{L}$  of the buffer solution containing the sensors. Subsequently, 15  $\mu\text{L}$  of analyte solutions or water were

dispensed. After this period, all extinction spectra of the AuNPs in the 96-well microplate were recorded within 20 min. Extinction spectra of the chemosensors were recorded from 400 nm to 800 nm by using a Tecan infinite 200 microplate reader.

## 5-2. Linear discriminant analysis (LDA)

### Qualitative assay

**Table S1** The jackknifed classification matrix of qualitative assay.

|         | A1 | A2 | A3 | A4 | A5 | A7 | A8 | A9 | A10 | A6 | control | %correct |
|---------|----|----|----|----|----|----|----|----|-----|----|---------|----------|
| A1      | 20 | 0  | 0  | 0  | 0  | 0  | 0  | 0  | 0   | 0  | 0       | 100      |
| A2      | 0  | 20 | 0  | 0  | 0  | 0  | 0  | 0  | 0   | 0  | 0       | 100      |
| A3      | 0  | 0  | 20 | 0  | 0  | 0  | 0  | 0  | 0   | 0  | 0       | 100      |
| A4      | 0  | 0  | 0  | 20 | 0  | 0  | 0  | 0  | 0   | 0  | 0       | 100      |
| A5      | 0  | 0  | 0  | 0  | 20 | 0  | 0  | 0  | 0   | 0  | 0       | 100      |
| A7      | 0  | 0  | 0  | 0  | 0  | 20 | 0  | 0  | 0   | 0  | 0       | 100      |
| A8      | 0  | 0  | 0  | 0  | 0  | 0  | 20 | 0  | 0   | 0  | 0       | 100      |
| A9      | 0  | 0  | 0  | 0  | 0  | 0  | 0  | 20 | 0   | 0  | 0       | 100      |
| A10     | 0  | 0  | 0  | 0  | 0  | 0  | 0  | 0  | 20  | 0  | 0       | 100      |
| A6      | 0  | 0  | 0  | 0  | 0  | 0  | 0  | 0  | 0   | 20 | 0       | 100      |
| control | 0  | 0  | 0  | 0  | 0  | 0  | 0  | 0  | 0   | 0  | 20      | 100      |
| Total   | 20 | 20 | 20 | 20 | 20 | 20 | 20 | 20 | 20  | 20 | 20      | 100      |

### Canonical Scores Plot

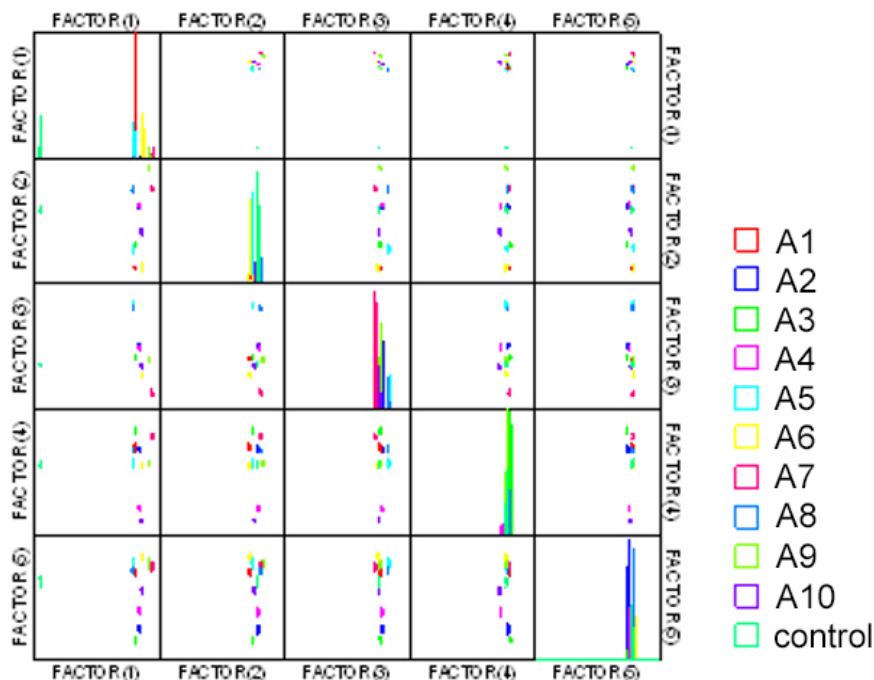

**Fig. S43** The canonical scores plot of qualitative assay.

**Semi-quantitative assay**

**Table S2** The jackknifed classification matrix of semi-quantitative assay.

|           | A7-0.1<br>μM | A7-0.2<br>μM | A7-0.3<br>μM | A7-0.4<br>μM | A7-0.5<br>μM | A9-0.6<br>mM | A9-0.7<br>mM | A9-0.9<br>mM | A9-1.2<br>mM | A9-2.0<br>mM |
|-----------|--------------|--------------|--------------|--------------|--------------|--------------|--------------|--------------|--------------|--------------|
| A7-0.1 μM | 20           | 0            | 0            | 0            | 0            | 0            | 0            | 0            | 0            | 0            |
| A7-0.2 μM | 0            | 20           | 0            | 0            | 0            | 0            | 0            | 0            | 0            | 0            |
| A7-0.3 μM | 0            | 0            | 20           | 0            | 0            | 0            | 0            | 0            | 0            | 0            |
| A7-0.4 μM | 0            | 0            | 0            | 20           | 0            | 0            | 0            | 0            | 0            | 0            |
| A7-0.5 μM | 0            | 0            | 0            | 0            | 20           | 0            | 0            | 0            | 0            | 0            |
| A9-0.6 mM | 0            | 0            | 0            | 0            | 0            | 20           | 0            | 0            | 0            | 0            |
| A9-0.7 mM | 0            | 0            | 0            | 0            | 0            | 0            | 20           | 0            | 0            | 0            |
| A9-0.9 mM | 0            | 0            | 0            | 0            | 0            | 0            | 0            | 20           | 0            | 0            |
| A9-1.2 mM | 0            | 0            | 0            | 0            | 0            | 0            | 0            | 0            | 20           | 0            |
| A9-2.0 mM | 0            | 0            | 0            | 0            | 0            | 0            | 0            | 0            | 0            | 20           |
| A6-10 μM  | 0            | 0            | 0            | 0            | 0            | 0            | 0            | 0            | 0            | 0            |
| A6-15 μM  | 0            | 0            | 0            | 0            | 0            | 0            | 0            | 0            | 0            | 0            |
| A6-3.0 μM | 0            | 0            | 0            | 0            | 0            | 0            | 0            | 0            | 0            | 0            |
| A6-5.0 μM | 0            | 0            | 0            | 0            | 0            | 0            | 0            | 0            | 0            | 0            |
| A6-7.0 μM | 0            | 0            | 0            | 0            | 0            | 0            | 0            | 0            | 0            | 0            |
| control   | 0            | 0            | 0            | 0            | 0            | 0            | 0            | 0            | 0            | 0            |
| Total     | 20           | 20           | 20           | 20           | 20           | 20           | 20           | 20           | 20           | 20           |

| Jackknifed Classification Matrix |          |          |           |           |           |         |          |
|----------------------------------|----------|----------|-----------|-----------|-----------|---------|----------|
|                                  | A6-10 μM | A6-15 μM | A6-3.0 μM | A6-5.0 μM | A6-7.0 μM | control | %correct |
| A7-0.1 μM                        | 0        | 0        | 0         | 0         | 0         | 0       | 100      |
| A7-0.2 μM                        | 0        | 0        | 0         | 0         | 0         | 0       | 100      |
| A7-0.3 μM                        | 0        | 0        | 0         | 0         | 0         | 0       | 100      |
| A7-0.4 μM                        | 0        | 0        | 0         | 0         | 0         | 0       | 100      |
| A7-0.5 μM                        | 0        | 0        | 0         | 0         | 0         | 0       | 100      |
| A9-0.6 μM                        | 0        | 0        | 0         | 0         | 0         | 0       | 100      |
| A9-0.7 mM                        | 0        | 0        | 0         | 0         | 0         | 0       | 100      |
| A9-0.9 mM                        | 0        | 0        | 0         | 0         | 0         | 0       | 100      |
| A9-1.2 mM                        | 0        | 0        | 0         | 0         | 0         | 0       | 100      |
| A9-2.0 mM                        | 0        | 0        | 0         | 0         | 0         | 0       | 100      |
| A6-10 μM                         | 20       | 0        | 0         | 0         | 0         | 0       | 100      |
| A6-15 μM                         | 0        | 20       | 0         | 0         | 0         | 0       | 100      |
| A6-3.0 μM                        | 0        | 0        | 20        | 0         | 0         | 0       | 100      |
| A6-5.0 μM                        | 0        | 0        | 0         | 20        | 0         | 0       | 100      |
| A6-7.0 μM                        | 0        | 0        | 0         | 0         | 20        | 0       | 100      |
| control                          | 0        | 0        | 0         | 0         | 0         | 20      | 100      |
| Total                            | 20       | 20       | 20        | 20        | 20        | 20      | 100      |

### 5-3. Regression analysis in mixtures: support vector machine (SVM)

**Table S3** Concentration conditions in the quantitative assay of the mixtures. The gray lines mean validation data sets while other lines mean calibration data sets. All measurements were carried out in a MES buffer solution (10 mM) at pH 5.5 at 25 °C.

| Histamine (mM) | Spermine ( $\mu\text{M}$ ) | Spermidine ( $\mu\text{M}$ ) |
|----------------|----------------------------|------------------------------|
| 0.50           | 0.300                      | 10.0                         |
| 0.45           | 0.250                      | 9.0                          |
| 0.40           | 0.200                      | 8.0                          |
| 0.35           | 0.175                      | 7.0                          |
| 0.30           | 0.150                      | 6.0                          |
| 0.25           | 0.125                      | 5.0                          |
| 0.20           | 0.100                      | 4.0                          |
| 0.15           | 0.075                      | 3.0                          |
| 0.10           | 0.050                      | 2.0                          |
| 0.05           | 0.025                      | 1.0                          |
| 0              | 0                          | 0                            |

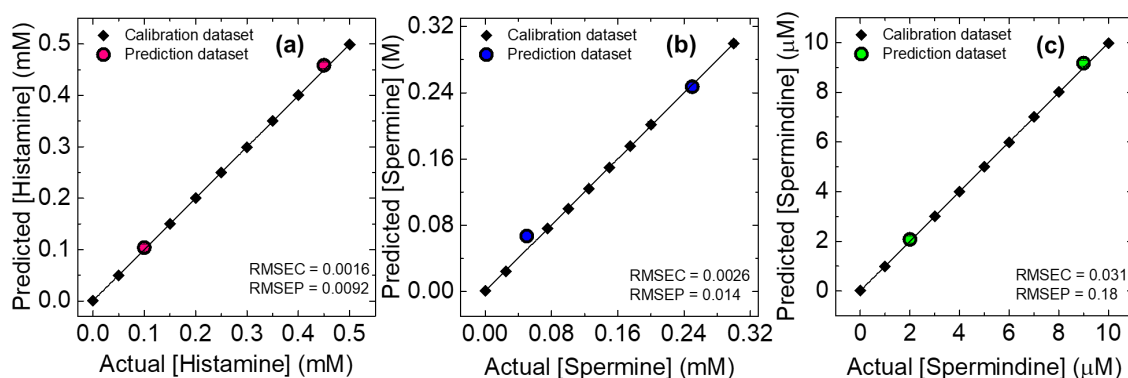

**Fig. S44** The results of regression analysis of (a) histamine, (b) spermine, and (c) spermidine in the mixtures. The values of the root mean-square of calibration (RMSEC) and prediction (RMSEP) prove high accuracies of the model and its predictive capacity.

## 6. Raw fish analysis

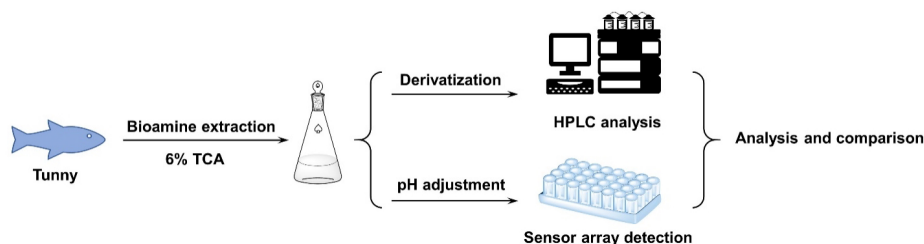

**Fig. S45** Schematic illustration of the extraction process of amines from the raw fish.



## 6-1. High performance liquid chromatography (HPLC) analysis

**Table S4** Gradient elution program for biogenic amines analysis.

| Time / min       | 0  | 5  | 20  | 24  | 25  | 30 | 60 |
|------------------|----|----|-----|-----|-----|----|----|
| Water / %        | 65 | 70 | 100 | 100 | 100 | 65 | 65 |
| Acetonitrile / % | 35 | 30 | 0   | 0   | 0   | 35 | 35 |

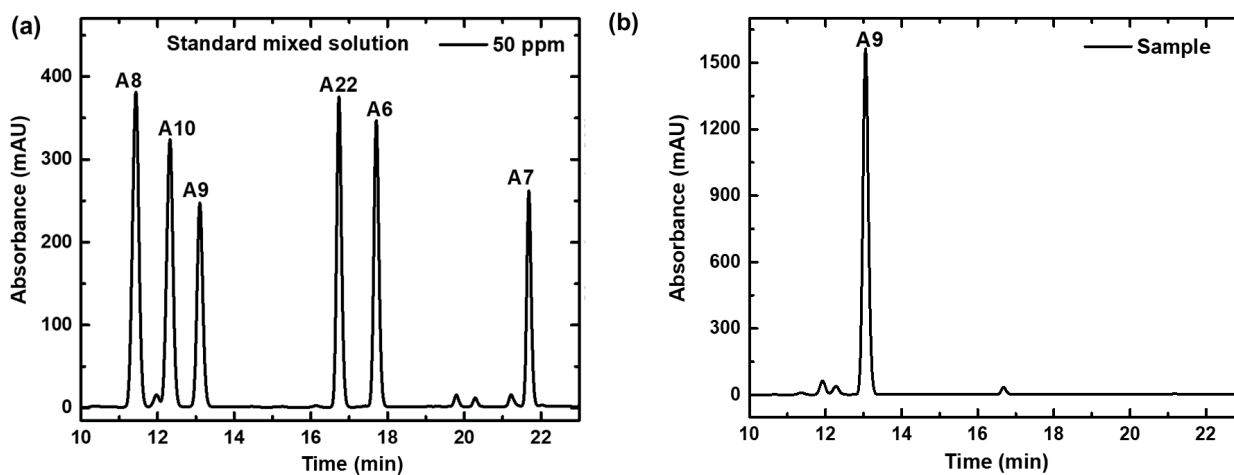

**Fig. S46** The adsorption spectrum of (a) the standard mixed solution and (b) the extracted sample from the fish (tuna) stored for 24 h at 25 °C. The 60 times diluted sample was used in this test.

## 7-2. Real sample analysis using the chemosensor array

**Table S5** Comparison table for HPLC and the chemosensor array.

| Time (h) | Histamine ( $\mu\text{M}$ ) |                |              |
|----------|-----------------------------|----------------|--------------|
|          | HPLC                        | Sensor array   | Accuracy (%) |
| 24       | 44.8                        | $38.3 \pm 0.6$ | 85.6         |
| 48       | 66.5                        | $69.6 \pm 1.7$ | 104.6        |
| 72       | 99.7                        | $96.9 \pm 2.0$ | 97.1         |
